# Supplementary material for: Maternal High Fat Diet in Lactation Impacts Hypothalamic Neurogenesis and Neurotrophic Development, Leading to Later Life Susceptibility to Obesity in Male but Not Female Mice
Source: PubMed Central journal article supplement (PMC10724448; doi:10.1002/advs.202305472), 2023-10-22
Supplement: ADVS-10-2305472-s001.pdf [file ADVS-10-2305472-s001.pdf]

## Supporting Information

for *Adv. Sci.*, DOI 10.1002/adv.202305472

Maternal High Fat Diet in Lactation Impacts Hypothalamic Neurogenesis and Neurotrophic Development, Leading to Later Life Susceptibility to Obesity in Male but Not Female Mice

*Yanchao Xu, Dengbao Yang, Lu Wang, Elżbieta Król, Mohsen Mazidi, Li Li, Yi Huang, Chaoqun Niu, Xue Liu, Sin Man Lam, Guanghou Shui, Alex Douglas and John R. Speakman\**

**Supplementary Table 1 Lists of the miRNAs in both fat and skim fraction of milk, as well as in pup's serum in control diet fed group**

| <b>miRNA name</b>              | <b>Milk skim fraction (CPM: means ± SEM)</b> | <b>Milk fat fraction (CPM: means ± SEM)</b> |
|--------------------------------|----------------------------------------------|---------------------------------------------|
| MIMAT0000154_mmu-miR-142a-5p   | 139895.92±7761.41                            | 145165.17±6267.05                           |
| MIMAT0028075_mmu-miR-7084-3p   | 86769.61±1816.96                             | 73079.21±5202.2                             |
| MIMAT0000657_mmu-miR-200c-3p   | 87065.26±1892.67                             | 73323.91±5216.18                            |
| MIMAT0000537_mmu-miR-27a-3p    | 42634.95±2461.6                              | 40747.61±319.75                             |
| MIMAT0027977_mmu-miR-7036a-3p  | 45825.43±1308.65                             | 32057.9±627.08                              |
| MIMAT0003473_mmu-miR-133a-5p   | 38705.42±1520                                | 33711.73±1808.05                            |
| MIMAT0028017_mmu-miR-7056-3p   | 38955.16±693.93                              | 34389.74±1385.32                            |
| MIMAT0027753_mmu-miR-6926-3p   | 23907.24±682.71                              | 33839.75±1104.1                             |
| MIMAT0003729_mmu-miR-216b-5p   | 15843.62±1416.18                             | 17546.83±711.84                             |
| MIMAT0027710_mmu-miR-6905-5p   | 14630.79±1988.92                             | 20895.92±1881.08                            |
| MIMAT0027958_mmu-miR-7027-5p   | 16862.2±642.84                               | 16210.67±2076.9                             |
| MIMAT0027737_mmu-miR-6918-3p   | 11880.41±995.22                              | 7389.54±471.3                               |
| MIMAT0000163_mmu-miR-153-3p    | 12905.23±176.62                              | 14745.95±710.89                             |
| MIMAT0028094_mmu-miR-7094-1-5p | 9685.43±552.64                               | 9088.78±443.52                              |
| MIMAT0000612_mmu-miR-135b-5p   | 9563±508.85                                  | 9135.34±404.19                              |
| MIMAT0017324_mmu-miR-669d-3p   | 7634±247.35                                  | 5823±79.96                                  |
| MIMAT0017169_mmu-miR-215-3p    | 7662.36±278.5                                | 9897.25±469.2                               |
| MIMAT0000558_mmu-miR-325-5p    | 7266.33±500.84                               | 9971.69±539.27                              |
| MIMAT0027998_mmu-miR-7047-5p   | 6352.16±283.91                               | 8295.24±213.78                              |
| MIMAT0022503_mmu-miR-344i      | 6901.03±1217.48                              | 7771.81±300.11                              |
| MIMAT0000140_mmu-miR-128-3p    | 5727.06±745.99                               | 5668.3±325.92                               |
| MIMAT0028088_mmu-miR-7091-5p   | 5033.93±218.42                               | 4377.78±66.13                               |
| MIMAT0028390_mmu-miR-7211-5p   | 5155.86±476.52                               | 9029.82±658.57                              |
| MIMAT0000520_mmu-miR-208a-3p   | 5914.2±284.46                                | 5238.72±746.06                              |
| MIMAT0027941_mmu-miR-7018-3p   | 5752.99±285.28                               | 5060.25±716.23                              |
| MIMAT0004529_mmu-miR-125b-2-3p | 4570.16±160.38                               | 3883.21±75.3                                |
| MIMAT0000383_mmu-let-7d-5p     | 4479.15±301.01                               | 4820.99±445.81                              |
| MIMAT0025140_mmu-miR-6391      | 4314.38±117.88                               | 5322.13±194.59                              |
| MIMAT0017054_mmu-miR-216a-3p   | 3751.33±318.56                               | 3963.87±99.8                                |
| MIMAT0004668_mmu-miR-138-1-3p  | 4494.76±122.62                               | 3463.71±114                                 |
| MIMAT0027734_mmu-miR-6917-5p   | 3651.93±245.47                               | 6351.32±488.78                              |
| MIMAT0022704_mmu-miR-489-5p    | 2898.26±190.37                               | 3389.09±189.43                              |
| MIMAT0001418_mmu-miR-431-5p    | 2881.23±230.52                               | 3989.68±151.61                              |
| MIMAT0027965_mmu-miR-7030-3p   | 2842.41±203.12                               | 4006.07±140.74                              |
| MIMAT0031401_1_mmu-miR-8099    | 2774.07±208.69                               | 2241.28±97.65                               |
| MIMAT0004187_mmu-miR-744-5p    | 2827.88±120.46                               | 3097.69±206.54                              |
| MIMAT0025085_mmu-miR-6342      | 1953.87±99.08                                | 2195.93±160.05                              |
| MIMAT0003485_mmu-miR-455-5p    | 1889.5±50.98                                 | 2606.92±173.38                              |
| MIMAT0005858_mmu-miR-1197-3p   | 1922.25±57.06                                | 1757.91±171.94                              |
| MIMAT0027731_mmu-miR-6915-3p   | 1778.6±126.15                                | 3162.32±167.77                              |
| MIMAT0027714_mmu-miR-6907-5p   | 1483.63±62.06                                | 1139.49±78.55                               |
| MIMAT0025113_mmu-miR-6369      | 2605.65±815.73                               | 843.44±239.2                                |
| MIMAT0027712_mmu-miR-6906-5p   | 2605.65±815.73                               | 843.44±239.2                                |

|                                |                |                |
|--------------------------------|----------------|----------------|
| MIMAT0017256_mmu-miR-700-5p    | 1354.96±29.28  | 1336.67±32.83  |
| MIMAT0004573_mmu-miR-293-5p    | 1859.33±689.33 | 1185.06±38.56  |
| MIMAT0022360_mmu-miR-5616-3p   | 1183.93±83     | 1594.77±49.91  |
| MIMAT0007873_mmu-miR-1896      | 1295.79±23.25  | 1612.99±100.24 |
| MIMAT0029814_mmu-miR-7654-5p   | 1724.86±258.97 | 1083.68±154.62 |
| MIMAT0005842_mmu-miR-669h-3p   | 963.8±122.84   | 1346.58±108.63 |
| MIMAT0014808_mmu-miR-344d-3p   | 1757.13±548.38 | 638.33±171.83  |
| MIMAT0028054_mmu-miR-7074-5p   | 1757.13±548.38 | 638.33±171.83  |
| MIMAT0014910_mmu-miR-3094-3p   | 882.59±28.6    | 1011.99±29.66  |
| MIMAT0025122_mmu-miR-6377      | 776.87±60.21   | 1213.36±74.27  |
| MIMAT0025129_mmu-miR-6383      | 967.26±88.65   | 1509.88±59.39  |
| MIMAT0019354_mmu-miR-28b       | 797.92±35.97   | 835.94±24.85   |
| MIMAT0022377_mmu-miR-5624-5p   | 990.13±82.65   | 989.91±108.49  |
| MIMAT0004939_mmu-miR-208b-3p   | 941.64±62.74   | 539.61±59.2    |
| MIMAT0014923_mmu-miR-344e-5p   | 638.54±44.12   | 604.46±35.82   |
| MIMAT0029800_mmu-miR-7649-5p   | 781.76±24.76   | 681.09±40.82   |
| MIMAT0000665_mmu-miR-223-3p    | 843.49±69.81   | 435.74±31.62   |
| MIMAT0027946_mmu-miR-7021-5p   | 760.74±69.78   | 716.81±42.95   |
| MIMAT0028005_mmu-miR-7050-3p   | 572.32±111.6   | 675.81±147.24  |
| MIMAT0031413_mmu-miR-8108      | 676.72±23.35   | 733.39±21.64   |
| MIMAT0014864_mmu-miR-3078-5p   | 625.28±15.15   | 558.91±10.03   |
| MIMAT0025583_mmu-miR-6538      | 803.5±81.73    | 643.96±74.84   |
| MIMAT0014856_1_mmu-miR-3074-5p | 758.86±74.93   | 652.48±73.48   |
| MIMAT0017060_mmu-miR-221-5p    | 1219.35±317.64 | 943.33±236.08  |
| MIMAT0004882_1_mmu-miR-466f-3p | 497.5±25.34    | 517.06±18.56   |
| MIMAT0029843_mmu-miR-7668-3p   | 487±48.28      | 515.94±26.88   |
| MIMAT0029883_mmu-miR-7681-3p   | 513.68±37.57   | 444.16±11.5    |
| MIMAT0027774_mmu-miR-6937-5p   | 528.06±30.03   | 537.69±43.03   |
| MIMAT0004758_mmu-miR-463-3p    | 436.68±30.95   | 220.46±19.73   |
| MIMAT0028030_mmu-miR-7063-5p   | 476.93±16.96   | 599.71±40.7    |
| MIMAT0003467_mmu-miR-688       | 445.89±29.47   | 434.45±40.73   |
| MIMAT0000663_mmu-miR-218-5p    | 374.15±38.39   | 787.62±65.09   |
| MIMAT0025123_mmu-let-7j        | 477.78±53.38   | 363.44±74.31   |
| MIMAT0004580_mmu-miR-34c-3p    | 452.1±17.85    | 383.48±9.46    |
| MIMAT0004875_4_mmu-miR-466b-5p | 398.16±24.53   | 442.99±24.17   |
| MIMAT0025138_mmu-miR-378c      | 413.81±45.13   | 396.94±10.96   |
| MIMAT0004847_mmu-miR-882       | 384±11.81      | 504.68±30.17   |
| MIMAT0017013_mmu-miR-196a-1-3p | 369.4±8.88     | 457.86±11.22   |
| MIMAT0000152_mmu-miR-140-3p    | 456.62±38.35   | 248.77±18.42   |
| MIMAT0000216_mmu-miR-187-3p    | 284.64±14.79   | 343.51±20.12   |
| MIMAT0000649_mmu-miR-17-5p     | 535.11±164.31  | 275.81±78.4    |
| MIMAT0028009_mmu-miR-7052-3p   | 351.06±14.02   | 189.46±4.54    |
| MIMAT0031399_mmu-miR-8097      | 429.36±42.86   | 442.04±50.57   |
| MIMAT0000529_mmu-miR-20a-5p    | 237.69±27.45   | 480.25±36.32   |
| MIMAT0027720_mmu-miR-6910-5p   | 312.69±65.89   | 523.99±163.26  |
| MIMAT0000659_mmu-miR-212-3p    | 270.92±7.7     | 198.44±14.17   |

|                                |              |              |
|--------------------------------|--------------|--------------|
| MIMAT0004623_mmu-let-7f-1-3p   | 312.37±15.48 | 282.53±25.35 |
| MIMAT0027976_mmu-miR-7036a-5p  | 313.48±15.87 | 282.71±25.34 |
| MIMAT0004843_mmu-miR-879-3p    | 259.53±11.33 | 355.59±26.91 |
| MIMAT0029815_mmu-miR-7654-3p   | 418.98±96.78 | 130.37±20.96 |
| MIMAT0031406_mmu-miR-8102      | 207.49±16.99 | 322.81±19.4  |
| MIMAT0005859_mmu-miR-1198-5p   | 394.56±63.81 | 76.07±22.98  |
| MIMAT0015646_mmu-miR-3474      | 225.17±21.6  | 65.44±3.21   |
| MIMAT0017278_mmu-miR-92b-5p    | 214.68±13.12 | 275.89±7.77  |
| MIMAT0022836_mmu-miR-299b-5p   | 277.29±19.62 | 176.86±14.99 |
| MIMAT0026642_mmu-miR-3475-5p   | 204.72±19.81 | 137.19±9.01  |
| MIMAT0017046_mmu-miR-101b-5p   | 145.72±15.4  | 181.94±12.5  |
| MIMAT0027735_mmu-miR-6917-3p   | 197.95±24.37 | 201.57±32.97 |
| MIMAT0017018_mmu-miR-16-2-3p   | 194.14±17.64 | 289.87±45.2  |
| MIMAT0000706_mmu-miR-362-5p    | 150.99±22.89 | 146.09±12.98 |
| MIMAT0000571_mmu-miR-331-3p    | 127.94±10.95 | 161.22±4.35  |
| MIMAT0027857_mmu-miR-6977-3p   | 149.27±5.97  | 98.19±4.42   |
| MIMAT0017243_9_mmu-miR-669a-3p | 144.59±11.85 | 91.37±8.46   |
| MIMAT0020624_mmu-miR-5116      | 135.09±20.03 | 113.91±5.76  |
| MIMAT0000217_mmu-miR-188-5p    | 113.54±3.96  | 99.37±2.63   |
| MIMAT0017021_mmu-miR-96-3p     | 108.49±10.07 | 112.68±4.37  |
| MIMAT0004940_mmu-miR-511-5p    | 176.62±26.49 | 152.69±22.43 |
| MIMAT0028048_mmu-miR-7071-5p   | 94.24±8.59   | 121.93±6.34  |
| MIMAT0016995_mmu-miR-182-3p    | 98.92±6.52   | 109.12±6.83  |
| MIMAT0025146_mmu-miR-6395      | 108.45±9.77  | 55.37±2.97   |
| MIMAT0027798_mmu-miR-6949-5p   | 105.67±4.52  | 165.91±12.94 |
| MIMAT0017063_mmu-miR-29b-2-5p  | 74.18±9.95   | 74.56±5.93   |
| MIMAT0027921_mmu-miR-7008-3p   | 120.99±14.74 | 106.74±8.82  |
| MIMAT0012773_mmu-miR-767       | 69.13±9.89   | 77.44±2.39   |
| MIMAT0000517_mmu-miR-192-5p    | 99.1±11.36   | 123.61±4.59  |
| MIMAT0016982_mmu-miR-128-1-5p  | 97.68±4.59   | 69.17±5.77   |
| MIMAT0027967_mmu-miR-7031-3p   | 104.76±9.05  | 66.83±3.43   |
| MIMAT0000536_mmu-miR-29c-3p    | 73.76±9.67   | 94.77±3.66   |
| MIMAT0001542_mmu-miR-449a-5p   | 121.01±17.21 | 143.64±11.36 |
| MIMAT0004581_mmu-miR-34b-3p    | 88.14±7.08   | 89.55±16.47  |
| MIMAT0004661_mmu-miR-28a-3p    | 85.34±4.54   | 75.36±6.93   |
| MIMAT0000162_mmu-miR-152-3p    | 63.75±7.71   | 94.31±15.64  |
| MIMAT0022356_1_mmu-miR-5615-3p | 80.65±9.48   | 82.11±2.54   |
| MIMAT0007868_mmu-miR-1903      | 85.41±1.58   | 67.06±7.76   |
| MIMAT0000378_mmu-miR-300-3p    | 76.38±4.38   | 64.33±6.83   |
| MIMAT0025175_mmu-miR-6419      | 95.69±5.57   | 78.34±2.84   |
| MIMAT0003471_1_mmu-miR-692     | 74.03±4.56   | 62.48±3.64   |
| MIMAT0004635_mmu-miR-92a-2-5p  | 151.71±57.55 | 73.86±19.43  |
| MIMAT0000225_mmu-miR-195a-5p   | 66.79±4.45   | 87.05±5.54   |
| MIMAT0014876_mmu-miR-3084-5p   | 66.79±4.45   | 87.05±5.54   |
| MIMAT0027851_mmu-miR-6974-3p   | 68.47±3.19   | 84.68±10.28  |
| MIMAT0004849_mmu-miR-883a-3p   | 68.47±3.19   | 84.68±10.28  |

|                                |             |               |
|--------------------------------|-------------|---------------|
| MIMAT0000647_mmu-miR-107-3p    | 64.61±5.72  | 55.72±7.49    |
| MIMAT0004631_mmu-miR-29a-5p    | 47.28±5.27  | 46.04±0.88    |
| MIMAT0028047_mmu-miR-7070-3p   | 73.36±10.83 | 50.25±5.44    |
| MIMAT0000247_mmu-miR-143-3p    | 54.36±4.77  | 92.93±4.4     |
| MIMAT0028133_mmu-miR-7118-5p   | 67.79±4.31  | 49.67±4.69    |
| MIMAT0000375_3_mmu-miR-297a-5p | 48.85±5     | 56.54±10.41   |
| MIMAT0027772_mmu-miR-6936-5p   | 50.68±7.18  | 43.65±0.82    |
| MIMAT0028074_mmu-miR-7084-5p   | 30.1±8.87   | 24.05±7.31    |
| MIMAT0027901_mmu-miR-6999-3p   | 53.83±2.07  | 39.24±3.27    |
| MIMAT0027867_mmu-miR-6982-3p   | 68.1±6.52   | 73.04±14.12   |
| MIMAT0025126_mmu-miR-6380      | 35.71±7.68  | 29.18±3.14    |
| MIMAT0000368_mmu-miR-291a-3p   | 39.51±4.29  | 32.04±5.96    |
| MIMAT0027970_mmu-miR-7033-5p   | 42.83±3.05  | 47.78±4.51    |
| MIMAT0000664_mmu-miR-219a-5p   | 38.85±3.93  | 28.9±2.17     |
| MIMAT0027790_mmu-miR-6945-5p   | 67.45±7.86  | 39.11±5.16    |
| MIMAT0027692_mmu-miR-6896-5p   | 50.04±6.15  | 24.78±3.42    |
| MIMAT0015643_mmu-miR-3472      | 37.56±3.58  | 45.4±3.35     |
| MIMAT0000386_mmu-miR-106b-5p   | 40.26±3.75  | 72.2±7.76     |
| MIMAT0017006_mmu-miR-143-5p    | 35.78±4.13  | 73.23±5.78    |
| MIMAT0027877_mmu-miR-6987-3p   | 48.69±4.05  | 23.96±1.06    |
| MIMAT0027339_mmu-miR-6481      | 47.61±5.72  | 21.85±3.56    |
| MIMAT0003783_mmu-miR-615-3p    | 32.96±3.22  | 31.23±2.23    |
| MIMAT0003481_mmu-miR-695       | 48.78±8.03  | 55.68±2.81    |
| MIMAT0000661_mmu-miR-214-3p    | 32.54±3.45  | 41.85±3.96    |
| MIMAT0016984_mmu-miR-132-5p    | 30.87±5.89  | 29.84±3.74    |
| MIMAT0028052_mmu-miR-7073-5p   | 32.86±2.94  | 34.16±4.13    |
| MIMAT0027934_mmu-miR-7015-5p   | 92.46±29.21 | 49.14±15.39   |
| MIMAT0000137_mmu-miR-126a-5p   | 30.87±5.89  | 29.84±3.74    |
| MIMAT0000211_mmu-miR-182-5p    | 39.36±1.9   | 34.93±2.64    |
| MIMAT0017012_mmu-miR-192-3p    | 44.34±2.86  | 141.81±49.13  |
| MIMAT0004870_mmu-miR-453       | 39.82±2.42  | 42.59±1.38    |
| MIMAT0017257_mmu-miR-701-3p    | 42.79±4.77  | 56.41±2.14    |
| MIMAT0000655_mmu-miR-100-5p    | 32.01±2.51  | 41.93±3.01    |
| MIMAT0022985_mmu-miR-5107-3p   | 38.26±2.31  | 41.65±1.18    |
| MIMAT0004527_2_mmu-miR-124-5p  | 49.24±14.51 | 267.77±144.07 |
| MIMAT0020642_mmu-miR-5131      | 34.44±2.48  | 22.32±0.42    |
| MIMAT0028011_mmu-miR-7053-3p   | 35.72±4     | 8.93±1.68     |
| MIMAT0028450_mmu-miR-7241-5p   | 34.44±2.48  | 22.32±0.42    |
| MIMAT0003409_2_mmu-miR-467a-5p | 69.74±13.92 | 54.77±13.61   |
| MIMAT0000528_mmu-miR-18a-5p    | 35.33±2.43  | 24.19±0.73    |
| MIMAT0025115_mmu-miR-6371      | 37.21±2.41  | 43.02±4.98    |
| MIMAT0000741_mmu-miR-377-3p    | 52.19±6.34  | 57.11±4.98    |
| MIMAT0028013_mmu-miR-7054-3p   | 39.9±2.98   | 29.65±3.87    |
| MIMAT0009419_1_mmu-miR-669m-3p | 30.39±2.14  | 45.61±3.03    |
| MIMAT0003711_mmu-miR-652-3p    | 25.4±2.93   | 40.74±3.61    |
| MIMAT0014906_mmu-miR-3092-3p   | 39.16±10.78 | 31.26±10.02   |

|                                |             |             |
|--------------------------------|-------------|-------------|
| MIMAT0000381_mmu-miR-34c-5p    | 33.13±1.81  | 34.96±3.89  |
| MIMAT0005835_mmu-miR-1b-5p     | 26.4±2.9    | 49.57±6.03  |
| MIMAT0000147_mmu-miR-135a-5p   | 31.73±4.69  | 43.22±5.95  |
| MIMAT0003477_mmu-miR-669a-5p   | 20.9±4      | 20.93±2.24  |
| MIMAT0000160_mmu-miR-150-5p    | 36.84±6.08  | 55.95±16.27 |
| MIMAT0004876_5_mmu-miR-466b-3p | 14.99±4.96  | 23.42±3.64  |
| MIMAT0016998_mmu-miR-190a-3p   | 26.04±3.03  | 12.33±2.19  |
| MIMAT0014877_1_mmu-miR-3084-3p | 31.56±1.92  | 13.11±1.27  |
| MIMAT0029850_mmu-miR-7672-5p   | 30.75±2.51  | 22.47±2.36  |
| MIMAT0031394_mmu-miR-8093      | 17.75±3.41  | 27.78±1.34  |
| MIMAT0029807_mmu-miR-219b-3p   | 40.73±12.99 | 16.98±2.53  |
| MIMAT0020629_mmu-miR-5121      | 19.27±4.48  | 18.71±2.33  |
| MIMAT0001637_mmu-miR-452-5p    | 25.96±3.06  | 23.32±1.55  |
| MIMAT0029823_mmu-miR-7658-3p   | 23.28±2     | 19.66±4.46  |
| MIMAT0004210_mmu-miR-804       | 14.89±4.51  | 16.85±2.84  |
| MIMAT0027843_mmu-miR-6970-3p   | 42.12±10.1  | 1.93±0.43   |
| MIMAT0027870_mmu-miR-6984-5p   | 34.52±4.07  | 33.22±5.89  |
| MIMAT0025077_mmu-miR-6335      | 24.67±1.66  | 19.48±1.39  |
| MIMAT0017240_mmu-miR-802-3p    | 14.44±2.89  | 2.57±0.52   |
| MIMAT0004618_mmu-miR-196a-2-3p | 16.27±2.05  | 13.48±1.59  |
| MIMAT0000210_1_mmu-miR-181a-5p | 24.17±1.64  | 31.05±2.89  |
| MIMAT0000532_mmu-miR-23a-3p    | 22.96±3.88  | 14.66±2.33  |
| MIMAT0027923_mmu-miR-7009-3p   | 15.73±1.29  | 17.51±1.29  |
| MIMAT0014825_mmu-miR-1251-3p   | 22.03±3.96  | 7.94±2.1    |
| MIMAT0025084_mmu-miR-6341      | 19.57±0.76  | 8.99±1.21   |
| MIMAT0028006_mmu-miR-7051-5p   | 22.62±4.86  | 5.68±0.82   |
| MIMAT0004628_mmu-miR-21a-3p    | 16.63±0.93  | 11.17±0.8   |
| MIMAT0017005_mmu-miR-122-3p    | 10.92±3.11  | 3.42±1.45   |
| MIMAT0017274_mmu-miR-466h-3p   | 14.87±1.35  | 22.44±1.86  |
| MIMAT0028394_mmu-miR-7213-5p   | 19.05±2.87  | 6.05±0.66   |
| MIMAT0022363_mmu-miR-5618-5p   | 11.82±1.8   | 7.55±0.58   |
| MIMAT0003892_mmu-miR-762       | 12.64±1.19  | 7.45±0.7    |
| MIMAT0029834_mmu-miR-7664-5p   | 13.93±3.25  | 13.7±3.17   |
| MIMAT0022374_mmu-miR-5623-3p   | 26.76±4.03  | 28.67±4.34  |
| MIMAT0025167_mmu-miR-378d      | 12.36±1.59  | 2.66±1.02   |
| MIMAT0020641_mmu-miR-5130      | 17.39±3.44  | 3.16±0.71   |
| MIMAT0025172_mmu-miR-6417      | 14.23±1.92  | 22.36±4.83  |
| MIMAT0017243_4_mmu-miR-669a-3p | 14.04±1.48  | 11.35±1.07  |
| MIMAT0027808_mmu-miR-6954-5p   | 18.07±1.36  | 7.14±1.26   |
| MIMAT0017070_mmu-miR-7a-2-3p   | 15.17±1.38  | 9.85±0.93   |
| MIMAT0017331_mmu-miR-1197-5p   | 13.79±3.72  | 24.63±6.53  |
| MIMAT0017216_mmu-miR-487b-5p   | 8.14±2.08   | 4.51±0.68   |
| MIMAT0027909_mmu-miR-6973b-3p  | 13.78±0.48  | 13.88±2.12  |
| MIMAT0027944_mmu-miR-7020-5p   | 16.52±3.24  | 9.26±2.88   |
| MIMAT0017249_mmu-miR-495-5p    | 14.83±1.05  | 21.93±2.88  |
| MIMAT0027912_mmu-miR-7004-5p   | 11.97±0.54  | 5.71±0.79   |

|                                |            |            |
|--------------------------------|------------|------------|
| MIMAT0003490_mmu-miR-700-3p    | 16.52±3.24 | 9.26±2.88  |
| MIMAT0028014_mmu-miR-7055-5p   | 13.08±1.89 | 8.24±0.95  |
| MIMAT0003469_mmu-miR-690       | 6.92±2.47  | 9.05±3.16  |
| MIMAT0003732_mmu-miR-668-3p    | 24.95±4.86 | 11.62±0.99 |
| MIMAT0027803_mmu-miR-6951-3p   | 10.34±1.41 | 5.89±2.07  |
| MIMAT0005843_mmu-miR-1188-5p   | 10.14±1.22 | 10.12±1.47 |
| MIMAT0005832_mmu-miR-669g      | 8.02±1.86  | 5±2.2      |
| MIMAT0003151_mmu-miR-378a-3p   | 10.34±1.41 | 5.89±2.07  |
| MIMAT0014866_mmu-miR-3079-5p   | 8.19±1.74  | 11.59±1.84 |
| MIMAT0005837_mmu-miR-1187      | 21.18±3.82 | 22.3±3.32  |
| MIMAT0004627_mmu-miR-20a-3p    | 9.7±2.39   | 8.13±1.5   |
| MIMAT0017254_mmu-miR-499-3p    | 7.26±2.18  | 6.73±0.83  |
| MIMAT0003725_mmu-miR-675-5p    | 10.33±0.92 | 7.9±0.76   |
| MIMAT0027814_mmu-miR-6957-5p   | 18.89±5.18 | 3.91±1.57  |
| MIMAT0028127_mmu-miR-7115-5p   | 11.2±1.53  | 11.78±1.06 |
| MIMAT0004872_1_mmu-miR-465b-3p | 6.49±1.71  | 6.16±0.9   |
| MIMAT0029901_mmu-miR-290b-3p   | 5.68±1.42  | 4.77±0.88  |
| MIMAT0009459_mmu-miR-1982-5p   | 7.25±1.86  | 9.8±1.25   |
| MIMAT0000124_mmu-miR-15b-5p    | 9.07±2.13  | 6.56±0.33  |
| MIMAT0003186_mmu-miR-369-3p    | 9.95±1.85  | 5.62±0.5   |
| MIMAT0025128_mmu-miR-6382      | 8.11±1.8   | 5.35±0.5   |
| MIMAT0004930_mmu-miR-466d-5p   | 10.2±1.13  | 6.5±0.66   |
| MIMAT0016981_mmu-miR-99a-3p    | 11.28±2.99 | 14.05±1.99 |
| MIMAT0029855_mmu-miR-3569-3p   | 9.74±0.82  | 0.87±0.39  |
| MIMAT0004933_mmu-miR-878-3p    | 8.97±1.62  | 3.15±0.42  |
| MIMAT0003376_mmu-miR-302c-3p   | 2.91±1.72  | 1.17±0.57  |
| MIMAT0000161_mmu-miR-151-3p    | 8.33±1.86  | 3.01±0.47  |
| MIMAT0029801_mmu-miR-7649-3p   | 5.09±1     | 5.36±1.54  |
| MIMAT0017030_mmu-miR-328-5p    | 2.93±1.25  | 1.8±0.5    |
| MIMAT0028091_mmu-miR-7092-3p   | 5.11±0.97  | 4.48±1.31  |
| MIMAT0020610_mmu-miR-5103      | 3.72±1.02  | 4.88±0.67  |
| MIMAT0014842_mmu-miR-3068-5p   | 9.5±0.99   | 6.19±1.75  |
| MIMAT0017017_mmu-let-7f-2-3p   | 4.93±0.8   | 30.81±5.14 |
| MIMAT0029833_mmu-miR-7663-3p   | 6.85±0.95  | 8.16±1.54  |
| MIMAT0014874_mmu-miR-3083-5p   | 3.22±1.23  | 1.71±0.44  |
| MIMAT0000379_mmu-miR-301a-3p   | 2.53±1.47  | 1.35±0.52  |
| MIMAT0027940_mmu-miR-7018-5p   | 4.31±0.99  | 8.3±0.45   |
| MIMAT0028086_mmu-miR-7090-5p   | 4.23±0.82  | 1.11±0.27  |
| MIMAT0025161_mmu-miR-6408      | 6.03±0.72  | 7.5±0.36   |
| MIMAT0031414_mmu-miR-1668      | 4.67±0.31  | 4.13±0.46  |
| MIMAT0028438_mmu-miR-7235-5p   | 7.05±1.65  | 9.17±1.02  |
| MIMAT0004746_mmu-miR-409-5p    | 6.54±1.52  | 10.48±2.19 |
| MIMAT0004665_mmu-miR-218-1-3p  | 2.57±1.14  | 3.31±0.99  |
| MIMAT0025148_mmu-miR-21c       | 4.26±1.43  | 4.32±0.57  |
| MIMAT0000533_1_mmu-miR-26a-5p  | 2.39±1.06  | 4±0.74     |
| MIMAT0027702_mmu-miR-6901-5p   | 7.9±1.18   | 8.02±0.68  |

|                                 |           |            |
|---------------------------------|-----------|------------|
| MIMAT0004897_mmu-miR-654-5p     | 7.67±0.97 | 11.21±1    |
| MIMAT0027894_mmu-miR-6996-5p    | 5.39±0.98 | 5.99±1.74  |
| MIMAT0022378_mmu-miR-5624-3p    | 4.84±1.96 | 2.69±0.41  |
| MIMAT0014837_mmu-miR-3065-3p    | 6.41±1.88 | 8.24±0.93  |
| MIMAT0022355_1_mmu-miR-5615-5p  | 5.24±1.06 | 11.28±2.23 |
| MIMAT0029867_mmu-miR-1191b-3p   | 6.19±1.31 | 2.23±0.94  |
| MIMAT0027865_mmu-miR-6981-3p    | 2.06±0.9  | 0.4±0.26   |
| MIMAT0027770_mmu-miR-6935-5p    | 5.67±1.47 | 7.38±1.23  |
| MIMAT0027855_mmu-miR-6976-3p    | 6.91±1.07 | 15.69±1.57 |
| MIMAT0025095_mmu-miR-6352       | 2.38±0.72 | 1.34±0.25  |
| MIMAT0003477_4_mmu-miR-669a-5p  | 3.37±0.5  | 5.92±0.68  |
| MIMAT0014897_mmu-miR-3088-5p    | 3.72±0.83 | 7.81±1.43  |
| MIMAT0017067_mmu-miR-181b-1-3p  | 1.62±0.96 | 1.4±0.34   |
| MIMAT0027831_mmu-miR-6965-3p    | 2.56±0.87 | 2.19±0.46  |
| MIMAT0024861_mmu-miR-6240       | 2.12±0.79 | 2.12±0.43  |
| MIMAT0004747_mmu-miR-411-5p     | 2.38±0.72 | 1.34±0.25  |
| MIMAT0002108_8_mmu-miR-467a-3p  | 6.93±2.61 | 1.69±0.64  |
| MIMAT0028038_mmu-miR-7067-5p    | 2.81±0.75 | 3.56±0.65  |
| MIMAT0014911_mmu-miR-3095-5p    | 2.99±1.28 | 1.13±0.41  |
| MIMAT0017172_mmu-miR-410-5p     | 4.36±0.89 | 11.51±2.07 |
| MIMAT0003457_1_mmu-miR-680      | 4.93±0.88 | 8.11±1.33  |
| MIMAT0029909_mmu-miR-7689-3p    | 3.07±0.3  | 0.67±0.15  |
| MIMAT0027822_mmu-miR-6961-5p    | 1.31±0.7  | 1±0.44     |
| MIMAT0004826_mmu-miR-146b-3p    | 2.16±0.69 | 2.65±0.65  |
| MIMAT0004324_mmu-miR-181d-5p    | 2.51±0.87 | 0.5±0.35   |
| MIMAT0014958_mmu-miR-1912-3p    | 5.14±1.15 | 8.61±1.9   |
| MIMAT0000539_1_mmu-miR-92a-3p   | 3.13±0.15 | 1.84±0.36  |
| MIMAT0027852_mmu-miR-6975-5p    | 3.77±1.04 | 2.54±0.96  |
| MIMAT0003457_mmu-miR-680        | 3.97±0.87 | 4.76±0.62  |
| MIMAT0028003_mmu-miR-7049-3p    | 2.86±0.49 | 2.25±0.55  |
| MIMAT0017004_mmu-miR-206-5p     | 3.04±0.65 | 3.55±0.98  |
| MIMAT0005851_mmu-miR-1193-3p    | 2.32±0.5  | 1.76±0.4   |
| MIMAT0017265_mmu-miR-871-3p     | 3.47±0.81 | 1.25±0.37  |
| MIMAT0003479_mmu-miR-669c-5p    | 1.11±0.78 | 0.09±0.09  |
| MIMAT0028058_mmu-miR-7076-5p    | 6.61±1.53 | 6.49±2.1   |
| MIMAT0004789_mmu-miR-450a-2-3p  | 2.48±1.28 | 3.5±0.28   |
| MIMAT0004622_mmu-let-7c-1-3p    | 3.48±1.1  | 3.49±1.01  |
| MIMAT0009402_mmu-miR-1938       | 3.11±0.38 | 0.79±0.45  |
| MIMAT0020644_mmu-miR-5133       | 1.36±0.69 | 0.8±0.3    |
| MIMAT0022366_mmu-miR-5619-3p    | 2.68±0.79 | 1.97±0.75  |
| MIMAT0028435_mmu-miR-7233-3p    | 2.43±0.82 | 7.08±0.79  |
| MIMAT0027777_mmu-miR-6938-3p    | 0.82±0.82 | 1.53±0.23  |
| MIMAT0003477_11_mmu-miR-669a-5p | 4.32±1.64 | 3.18±0.45  |
| MIMAT0000223_mmu-miR-193a-3p    | 1.66±0.74 | 1.93±0.37  |
| MIMAT0004871_mmu-miR-465b-5p    | 2.76±0.97 | 0.64±0.38  |
| MIMAT0017232_mmu-miR-301b-5p    | 2.42±0.77 | 0.09±0.09  |



|                                 |           |           |
|---------------------------------|-----------|-----------|
| MIMAT0004851_mmu-miR-883b-3p    | 3.41±1.65 | 1.8±0.57  |
| MIMAT0027799_mmu-miR-6949-3p    | 1.01±0.59 | 1.59±0.56 |
| MIMAT0017353_mmu-miR-664-5p     | 1.53±0.67 | 1.08±0.32 |
| MIMAT0003742_mmu-miR-455-3p     | 1.26±0.49 | 2.2±0.52  |
| MIMAT0000653_mmu-miR-28a-5p     | 1.12±0.65 | 0.41±0.26 |
| MIMAT0000582_mmu-miR-338-3p     | 2.51±0.55 | 5.26±0.7  |
| MIMAT0022359_mmu-miR-5616-5p    | 0.55±0.55 | 0.09±0.09 |
| MIMAT0003409_7_mmu-miR-467a-5p  | 1.55±0.28 | 0.94±0.27 |
| MIMAT0004875_2_mmu-miR-466b-5p  | 1.53±0.67 | 0.58±0.23 |
| MIMAT0001419_mmu-miR-433-5p     | 0.55±0.55 | 0±0       |
| MIMAT0001094_mmu-miR-412-3p     | 2.95±1.16 | 0.86±0.34 |
| MIMAT0027960_mmu-miR-7028-5p    | 0.8±0.52  | 0.77±0.33 |
| MIMAT0002108_1_mmu-miR-467a-3p  | 3.89±0.87 | 4.53±0.2  |
| MIMAT0029858_mmu-miR-7675-5p    | 1.57±0.31 | 2.1±0.52  |
| MIMAT0029886_mmu-miR-7683-5p    | 1.83±0.29 | 0±0       |
| MIMAT0027693_mmu-miR-6896-3p    | 1.09±0.45 | 0.5±0.23  |
| MIMAT0000375_1_mmu-miR-297a-5p  | 3.65±0.75 | 3.21±0.73 |
| MIMAT0025083_mmu-miR-6340       | 1.66±0.74 | 0.31±0.18 |
| MIMAT0022383_mmu-miR-344h-5p    | 1.24±0.73 | 0.81±0.48 |
| MIMAT0027812_mmu-miR-6956-5p    | 2.76±0.67 | 4.92±1.09 |
| MIMAT0027785_mmu-miR-6942-3p    | 1.85±0.32 | 3.14±0.45 |
| MIMAT0025100_mmu-miR-6357       | 0.78±0.52 | 1.31±0.65 |
| MIMAT0001546_1_mmu-miR-450a-5p  | 1.94±0.98 | 1.47±0.51 |
| MIMAT0027757_mmu-miR-6928-3p    | 3.52±1.51 | 1.76±0.51 |
| MIMAT0014948_mmu-miR-3108-3p    | 1.09±0.45 | 0.5±0.23  |
| MIMAT0027878_mmu-miR-6988-5p    | 1.85±0.32 | 3.14±0.45 |
| MIMAT0003477_10_mmu-miR-669a-5p | 5.04±1.11 | 2.85±0.74 |
| MIMAT0025159_mmu-miR-6406       | 0.84±0.53 | 0.14±0.14 |
| MIMAT0028434_mmu-miR-7233-5p    | 2.3±0.61  | 0.95±0.46 |
| MIMAT0003464_mmu-miR-686        | 1.05±0.61 | 0±0       |
| MIMAT0025079_mmu-miR-6336       | 1.09±0.45 | 0.09±0.09 |
| MIMAT0027839_mmu-miR-6968-3p    | 0.76±0.25 | 0±0       |
| MIMAT0022505_mmu-miR-5710       | 1.04±0.05 | 0.14±0.14 |
| MIMAT0000229_mmu-miR-199a-5p    | 0.27±0.27 | 0.4±0.26  |
| MIMAT0029862_mmu-miR-129b-5p    | 0.27±0.27 | 0.14±0.14 |
| MIMAT0028433_mmu-miR-7232-3p    | 3.07±0.9  | 0.81±0.48 |
| MIMAT0005849_mmu-miR-1191a      | 0.27±0.27 | 0.23±0.13 |
| MIMAT0027928_mmu-miR-7012-5p    | 1.59±0.72 | 0.54±0.07 |
| MIMAT0029885_mmu-miR-7682-3p    | 3.39±1.7  | 6.44±1.38 |
| MIMAT0003893_mmu-miR-761        | 0.27±0.27 | 0±0       |
| MIMAT0004545_mmu-miR-200b-5p    | 0.51±0.29 | 0.14±0.14 |
| MIMAT0027344_mmu-miR-6516-3p    | 0.76±0.25 | 0.13±0.13 |
| MIMAT0009419_mmu-miR-669m-3p    | 0.56±0.32 | 0±0       |
| MIMAT0029831_mmu-miR-7662-3p    | 0.79±0.27 | 0.71±0.32 |
| MIMAT0028400_mmu-miR-7216-5p    | 2.47±1.46 | 7.03±1.37 |
| MIMAT0025130_mmu-miR-6384       | 0.51±0.29 | 0.31±0.18 |

|                                |           |           |
|--------------------------------|-----------|-----------|
| MIMAT0027991_mmu-miR-7043-3p   | 2.16±1.24 | 1.16±0.42 |
| MIMAT0014808_1_mmu-miR-344d-3p | 0.27±0.27 | 0±0       |
| MIMAT0025170_mmu-miR-6416-5p   | 0.56±0.32 | 0±0       |
| MIMAT0009415_mmu-miR-1948-3p   | 0.74±0.45 | 0.9±0.1   |
| MIMAT0000209_1_mmu-miR-129-5p  | 0.27±0.27 | 0±0       |
| MIMAT0000588_mmu-miR-341-3p    | 0.27±0.27 | 0.09±0.09 |
| MIMAT0017323_mmu-miR-669k-5p   | 0.51±0.29 | 0.09±0.09 |
| MIMAT0027740_mmu-miR-6920-5p   | 1.86±0.57 | 0.67±0.15 |
| MIMAT0029842_mmu-miR-7668-5p   | 0.56±0.32 | 0.32±0.19 |
| MIMAT0000708_mmu-miR-363-3p    | 0.85±0.55 | 0.58±0.3  |
| MIMAT0025178_mmu-miR-451b      | 0.27±0.27 | 1.52±0.75 |
| MIMAT0025166_mmu-miR-6413      | 0.27±0.27 | 0±0       |
| MIMAT0017342_mmu-miR-1943-3p   | 0.27±0.27 | 0.4±0.26  |
| MIMAT0009455_mmu-miR-1983      | 1.24±0.46 | 0.58±0.3  |
| MIMAT0017058_mmu-miR-26a-2-3p  | 0.81±0.27 | 0.35±0.35 |
| MIMAT0014836_mmu-miR-3065-5p   | 1.92±0.97 | 0.41±0.26 |
| MIMAT0027845_mmu-miR-6971-3p   | 0.27±0.27 | 0±0       |
| MIMAT0027733_mmu-miR-6916-3p   | 0.76±0.25 | 0±0       |
| MIMAT0027715_mmu-miR-6907-3p   | 0.27±0.27 | 1.49±0.67 |
| MIMAT0028409_mmu-miR-7220-3p   | 1.25±0.57 | 2.68±0.78 |
| MIMAT0007870_mmu-miR-1900      | 0.27±0.27 | 0.23±0.14 |
| MIMAT0027789_mmu-miR-6944-3p   | 0.27±0.27 | 0.99±0.26 |
| MIMAT0028021_mmu-miR-7058-3p   | 0.51±0.29 | 0.4±0.15  |
| MIMAT0014949_mmu-miR-3109-5p   | 2.06±0.4  | 1.62±0.23 |
| MIMAT0002106_mmu-miR-465a-5p   | 0.79±0.27 | 1.75±0.26 |
| MIMAT0000590_mmu-miR-342-3p    | 1.26±0.63 | 1.03±0.22 |
| MIMAT0029830_mmu-miR-7662-5p   | 0.27±0.27 | 0±0       |
| MIMAT0000521_mmu-let-7a-5p     | 0.27±0.27 | 0.13±0.13 |
| MIMAT0004931_mmu-miR-466d-3p   | 0.81±0.27 | 0.28±0.28 |
| MIMAT0036459_mmu-miR-9768-5p   | 0.56±0.32 | 0.54±0.07 |
| MIMAT0004524_mmu-miR-30b-3p    | 0.27±0.27 | 0.09±0.09 |
| MIMAT0000220_mmu-miR-190a-5p   | 2.56±0.85 | 1.59±0.91 |
| MIMAT0028421_mmu-miR-7226-3p   | 0.85±0.55 | 0.41±0.26 |
| MIMAT0017036_mmu-miR-148b-5p   | 1.86±0.57 | 1.08±0.66 |
| MIMAT0005845_mmu-miR-466k      | 0.27±0.27 | 0.36±0.26 |
| MIMAT0029799_mmu-miR-7648-3p   | 1.24±0.46 | 2.29±0.41 |
| MIMAT0027980_mmu-miR-7038-5p   | 1.36±0.73 | 0.77±0.33 |
| MIMAT0028060_mmu-miR-7077-5p   | 0.27±0.27 | 0±0       |
| MIMAT0000740_mmu-miR-376a-3p   | 0.27±0.27 | 0±0       |
| MIMAT0027993_mmu-miR-7044-3p   | 1.74±0.85 | 0.14±0.14 |
| MIMAT0028425_mmu-miR-7228-3p   | 0.76±0.25 | 1.22±0.2  |
| MIMAT0027969_mmu-miR-7032-3p   | 0.79±0.27 | 0.4±0.15  |
| MIMAT0003895_mmu-miR-764-3p    | 0.27±0.27 | 0.54±0.23 |
| MIMAT0027776_mmu-miR-6938-5p   | 0.97±0.65 | 0.44±0.15 |
| MIMAT0029881_mmu-miR-465d-3p   | 2.67±1.04 | 1.36±0.64 |
| MIMAT0027788_mmu-miR-6944-5p   | 0.74±0.45 | 1.98±0.47 |

|                                |           |           |
|--------------------------------|-----------|-----------|
| MIMAT0000127_mmu-miR-29b-3p    | 0.74±0.45 | 1.3±0.12  |
| MIMAT0014933_mmu-miR-3102-5p   | 0.27±0.27 | 0±0       |
| MIMAT0004857_mmu-miR-147-3p    | 1.22±0.57 | 1.62±0.24 |
| MIMAT0031407_mmu-miR-8103      | 0.85±0.55 | 1±0.58    |
| MIMAT0003898_mmu-miR-760-3p    | 0.27±0.27 | 0.13±0.13 |
| MIMAT0017071_mmu-miR-7b-3p     | 0.27±0.27 | 0±0       |
| MIMAT0029811_mmu-miR-7652-3p   | 0.51±0.29 | 0.31±0.18 |
| MIMAT0031400_mmu-miR-8098      | 0.79±0.27 | 0.23±0.13 |
| MIMAT0027848_mmu-miR-6973a-5p  | 0.27±0.27 | 0.09±0.09 |
| MIMAT0029832_mmu-miR-7663-5p   | 1.02±0.38 | 0.55±0.23 |
| MIMAT0027749_mmu-miR-6924-3p   | 0.27±0.27 | 0±0       |
| MIMAT0000678_mmu-miR-7b-5p     | 0.53±0.3  | 0.13±0.13 |
| MIMAT0031421_mmu-miR-8115      | 0.51±0.29 | 0.37±0.37 |
| MIMAT0029828_mmu-miR-7661-5p   | 0.76±0.25 | 0.09±0.09 |
| MIMAT0000149_mmu-miR-137-3p    | 0.81±0.27 | 0.67±0.34 |
| MIMAT0028031_mmu-miR-7063-3p   | 0.53±0.3  | 0.98±0.44 |
| MIMAT0014856_mmu-miR-3074-5p   | 3.06±0.66 | 0.99±0.58 |
| MIMAT0004636_mmu-miR-93-3p     | 0.56±0.32 | 0±0       |
| MIMAT0027775_mmu-miR-6937-3p   | 0.53±0.3  | 0.13±0.13 |
| MIMAT0004877_1_mmu-miR-466c-5p | 0.27±0.27 | 0.09±0.09 |
| MIMAT0014832_mmu-miR-3063-5p   | 0.27±0.27 | 0±0       |
| MIMAT0031393_mmu-miR-8092      | 0.27±0.27 | 0.54±0.38 |
| MIMAT0000652_mmu-miR-25-3p     | 1.36±0.73 | 0.77±0.33 |
| MIMAT0000387_mmu-miR-130b-3p   | 0.27±0.27 | 0±0       |
| MIMAT0017081_mmu-miR-381-5p    | 2.52±0.55 | 3.27±0.58 |
| MIMAT0009436_mmu-miR-1963      | 0.56±0.32 | 0.18±0.18 |
| MIMAT0028136_mmu-miR-7119-3p   | 3.66±1.2  | 1.08±0.55 |
| MIMAT0027936_mmu-miR-7016-5p   | 0.56±0.32 | 0.54±0.07 |
| MIMAT0000743_mmu-miR-379-5p    | 0.27±0.27 | 0.09±0.09 |
| MIMAT0009422_mmu-miR-1951      | 0.51±0.29 | 0.32±0.19 |
| MIMAT0027896_mmu-miR-6997-5p   | 0.53±0.3  | 0±0       |
| MIMAT0027964_mmu-miR-7030-5p   | 2.28±0.93 | 6.17±0.91 |
| MIMAT0014922_mmu-miR-3101-3p   | 0.81±0.27 | 0.14±0.14 |
| MIMAT0004898_mmu-miR-654-3p    | 2.67±1.04 | 1.36±0.64 |
| MIMAT0001090_mmu-miR-409-3p    | 0.74±0.45 | 0.35±0.35 |
| MIMAT0022386_mmu-miR-5627-3p   | 1.71±1    | 3.31±0.72 |

CPM: raw counts per million

**Supplementary Table 2 Lists of the miRNA in milk and pup serum significant affected by maternal HFD.**

The miRNA in milk

| miRNA name                     | log2 FC (CON/HFD) | P - value   | FDR         |
|--------------------------------|-------------------|-------------|-------------|
| MIMAT0020629_mmu-miR-5121      | -2.3              | 0.000393515 | 0.006895066 |
| MIMAT0000528_mmu-miR-18a-5p    | -1.8              | 3.88E-05    | 0.00094492  |
| MIMAT0024861_mmu-miR-6240      | -1.7              | 1.07E-05    | 0.000565426 |
| MIMAT0020637_mmu-miR-5126      | -1.7              | 0.000114592 | 0.00550042  |
| MIMAT0000223_mmu-miR-193a-3p   | -1.1              | 2.28E-05    | 0.000655548 |
| MIMAT0000513_mmu-miR-19b-3p    | -0.8              | 2.63E-06    | 8.85E-05    |
| MIMAT0000584_mmu-miR-339-5p    | -0.8              | 0.002654441 | 0.036428206 |
| MIMAT0000545_mmu-miR-98-5p     | -0.7              | 0.000496202 | 0.008332056 |
| MIMAT0000653_mmu-miR-28a-5p    | -0.7              | 4.94E-05    | 0.001047009 |
| MIMAT0019345_mmu-miR-1843b-5p  | -0.7              | 3.61E-05    | 0.00094492  |
| MIMAT0000162_mmu-miR-152-3p    | -0.6              | 0.000146914 | 0.002691195 |
| MIMAT0004617_mmu-miR-148a-5p   | 0.5               | 0.00060173  | 0.009699892 |
| MIMAT0005443_mmu-miR-181a-2-3p | 0.6               | 0.000124837 | 0.002395689 |
| MIMAT0004529_mmu-miR-125b-2-3p | 0.8               | 9.57E-05    | 0.001928765 |
| MIMAT0000208_mmu-miR-10b-5p    | 0.9               | 1.71E-06    | 6.27E-05    |
| MIMAT0004580_mmu-miR-34c-3p    | 1                 | 0.002825465 | 0.036731049 |
| MIMAT0004628_mmu-miR-21a-3p    | 1                 | 0.002084915 | 0.030007888 |
| MIMAT0003509_mmu-miR-501-3p    | 1.2               | 0.0016694   | 0.024917335 |
| MIMAT0000230_mmu-miR-199a-3p   | 1.3               | 0.001014802 | 0.015729435 |
| MIMAT0000155_mmu-miR-142a-3p   | 1.6               | 4.20E-05    | 0.00094492  |
| MIMAT0031402_mmu-miR-142b      | 1.6               | 4.22E-05    | 0.00094492  |
| MIMAT0017068_mmu-miR-181c-3p   | 1.7               | 1.03E-13    | 8.30E-12    |
| MIMAT0017078_mmu-miR-375-5p    | 2.7               | 9.58E-08    | 3.86E-06    |

The miRNA in pup serum

| miRNA name                   | log2 FC(CON/HFD) | P - value | FDR      |
|------------------------------|------------------|-----------|----------|
| MIMAT0014809_mmu-miR-1298-5p | -2.2             | 0.02433   | 0.89819  |
| MIMAT0000212_mmu-miR-183-5p  | -1.9             | 3.29E-12  | 2.18E-09 |
| MIMAT0004746_mmu-miR-409-5p  | -1.8             | 0.009243  | 0.611896 |
| MIMAT0009426_mmu-miR-1955-5p | -1.7             | 0.009965  | 0.611896 |
| MIMAT0017060_mmu-miR-221-5p  | -1.6             | 0.000504  | 0.111737 |
| MIMAT0016997_mmu-miR-187-5p  | -1.5             | 0.046999  | 1        |
| MIMAT0003509_mmu-miR-501-3p  | -1.2             | 1.34E-08  | 5.93E-06 |
| MIMAT0016996_mmu-miR-185-3p  | -0.9             | 0.048505  | 1        |
| MIMAT0031410_mmu-miR-3535    | -0.9             | 0.021044  | 0.89819  |
| MIMAT0004842_mmu-miR-879-5p  | -0.8             | 0.002836  | 0.401793 |
| MIMAT0000214_mmu-miR-185-5p  | -0.8             | 0.031667  | 1        |
| MIMAT0000655_mmu-miR-100-5p  | -0.8             | 9.63E-08  | 3.20E-05 |
| MIMAT0000131_mmu-miR-99a-5p  | -0.7             | 1.50E-12  | 1.99E-09 |
| MIMAT0004661_mmu-miR-28a-3p  | -0.7             | 2.38E-07  | 6.33E-05 |

|                                |      |          |          |
|--------------------------------|------|----------|----------|
| MIMAT0004862_mmu-miR-877-3p    | -0.7 | 0.043928 | 1        |
| MIMAT0000233_mmu-miR-200b-3p   | -0.6 | 0.000815 | 0.154652 |
| MIMAT0000517_mmu-miR-192-5p    | -0.3 | 0.036872 | 1        |
| MIMAT0000533_mmu-miR-26a-5p    | -0.3 | 0.011191 | 0.646634 |
| MIMAT0000580_mmu-miR-148b-3p   | -0.3 | 0.019681 | 0.888197 |
| MIMAT0000533_1_mmu-miR-26a-5p  | -0.3 | 0.010129 | 0.611896 |
| MIMAT0000221_mmu-miR-191-5p    | -0.3 | 0.003023 | 0.401793 |
| MIMAT0019345_mmu-miR-1843b-5p  | -0.2 | 0.03637  | 1        |
| MIMAT0000140_1_mmu-miR-128-3p  | -0.2 | 0.012108 | 0.665459 |
| MIMAT0000161_mmu-miR-151-3p    | -0.2 | 0.008496 | 0.611896 |
| MIMAT0000130_mmu-miR-30b-5p    | -0.1 | 0.045445 | 1        |
| MIMAT0000652_mmu-miR-25-3p     | 0.2  | 0.024228 | 0.89819  |
| MIMAT0000238_mmu-miR-205-5p    | 0.2  | 0.033291 | 1        |
| MIMAT0000540_mmu-miR-93-5p     | 0.2  | 0.001335 | 0.221848 |
| MIMAT0000146_mmu-miR-134-5p    | 0.3  | 0.022538 | 0.89819  |
| MIMAT0000545_mmu-miR-98-5p     | 0.3  | 0.027914 | 1        |
| MIMAT0000766_mmu-miR-335-5p    | 0.3  | 0.00951  | 0.611896 |
| MIMAT0003732_mmu-miR-668-3p    | 0.3  | 0.033255 | 1        |
| MIMAT0001421_mmu-miR-434-5p    | 0.3  | 0.02005  | 0.888197 |
| MIMAT0000160_mmu-miR-150-5p    | 0.3  | 0.009    | 0.611896 |
| MIMAT0001091_mmu-miR-410-3p    | 0.3  | 0.016037 | 0.787846 |
| MIMAT0001420_mmu-miR-433-3p    | 0.4  | 0.016599 | 0.787846 |
| MIMAT0000157_mmu-miR-145a-5p   | 0.4  | 0.014023 | 0.716789 |
| MIMAT0003120_mmu-miR-483-3p    | 0.4  | 0.012518 | 0.665459 |
| MIMAT0001418_mmu-miR-431-5p    | 0.4  | 0.007138 | 0.611896 |
| MIMAT0004530_mmu-miR-127-5p    | 0.4  | 0.006872 | 0.611896 |
| MIMAT0003453_mmu-miR-497a-5p   | 0.5  | 0.006365 | 0.611896 |
| MIMAT0000124_mmu-miR-15b-5p    | 0.5  | 0.005789 | 0.611896 |
| MIMAT0000769_mmu-miR-133b-3p   | 0.5  | 0.024209 | 0.89819  |
| MIMAT0003734_mmu-miR-667-3p    | 0.5  | 0.006367 | 0.611896 |
| MIMAT0004782_mmu-miR-483-5p    | 0.5  | 0.046625 | 1        |
| MIMAT0017018_mmu-miR-16-2-3p   | 0.6  | 0.039794 | 1        |
| MIMAT0011213_mmu-miR-2137      | 0.7  | 0.035012 | 1        |
| MIMAT0003473_1_mmu-miR-133a-5p | 0.7  | 0.047528 | 1        |
| MIMAT0000567_mmu-miR-329-3p    | 1    | 0.023432 | 0.89819  |
| MIMAT0004519_mmu-let-7g-3p     | 1.4  | 0.046664 | 1        |
| MIMAT0004539_mmu-miR-183-3p    | 1.5  | 0.007954 | 0.611896 |

**Supplementary Table 3 Statistic summary**

**Figure 1A-AG**

Up or down in high fat diet mice compared with low fat diet mice

|                  | <b>Diet effect</b> |        | <b>Day effect</b> |        | <b>Interaction</b> |        |
|------------------|--------------------|--------|-------------------|--------|--------------------|--------|
|                  | P Value            | Change | P Value           | Change | P Value            | Change |
| <b>Figure 1A</b> | 0.024              | up     | <0.0001           | up     | <0.0001            | yes    |
| <b>Figure 1B</b> | 0.673              | no     | <0.0001           | up     | >0.9999            | no     |
| <b>Figure 1C</b> | 0.0067             | up     | <0.0001           | up     | <0.0001            | yes    |
| <b>Figure 1D</b> | 0.5997             | no     | <0.0001           | up     | 0.9885             | no     |
| <b>Figure 1E</b> | 0.04               | up     | <0.0001           | up     | <0.0001            | yes    |
| <b>Figure 1F</b> | 0.0013             | up     | <0.0001           | up     | <0.0001            | yes    |
| <b>Figure 1G</b> | 0.0163             | up     | <0.0001           | up     | <0.0001            | yes    |
| <b>Figure 1H</b> | 0.0011             | up     | <0.0001           | up     | <0.0001            | yes    |

**Figure 1I-1J**

| <b>Area</b>             | <b>Subcutaneous fat</b> |        | <b>Visceral fat</b> |        | <b>Total fat</b> |        |
|-------------------------|-------------------------|--------|---------------------|--------|------------------|--------|
|                         | P                       | change | P                   | change | P                | change |
| <b>Figure 1I male</b>   | 0.04                    | up     | 0.5512              | no     | 0.0612           | no     |
| <b>Figure 1I female</b> | 0.0122                  | up     | 0.1323              | no     | 0.0167           | up     |
| <b>Figure 1J male</b>   | 0.04                    | up     | 0.0057              | up     | 0.0289           | up     |
| <b>Figure 1J female</b> | 0.0047                  | up     | 0.029               | up     | 0.0061           | up     |

**Figure 2B**

Up or down in high fat diet mice compared with low fat diet mice

| <b>Name</b>   | <b>Male</b> |        | <b>Female</b> |        |
|---------------|-------------|--------|---------------|--------|
|               | P Value     | Change | P Value       | Change |
| <b>AGRP</b>   | 0.083581    | no     | 0.793746      | no     |
| <b>NPY</b>    | 0.55128     | no     | 0.006104      | down   |
| <b>NPY1R</b>  | 0.354483    | no     | 0.0108        | down   |
| <b>NPY2R</b>  | 0.152947    | no     | 0.054585      | no     |
| <b>NPY5R</b>  | 0.433106    | no     | 0.030023      | down   |
| <b>POMC</b>   | 0.003447    | up     | 0.929845      | no     |
| <b>CARTPT</b> | 0.000137    | up     | 0.014008      | up     |
| <b>MC4R</b>   | 0.299701    | no     | 0.096373      | no     |
| <b>HTR1A</b>  | 0.023426    | down   | 0.0019        | down   |
| <b>HTR1B</b>  | 0.000338    | down   | 1.48E-08      | down   |
| <b>HTR1D</b>  | 0.602519    | no     | 0.013238      | down   |
| <b>HTR2A</b>  | 0.000291    | down   | 0.00049       | down   |
| <b>HTR2C</b>  | 0.003436    | down   | 9.85E-05      | down   |
| <b>HTR3A</b>  | 0.017096    | dpwn   | 0.895978      | no     |
| <b>HTR4</b>   | 0.550919    | no     | 0.028467      | down   |

|              |          |    |          |      |
|--------------|----------|----|----------|------|
| <b>HTR5A</b> | 0.189574 | no | 0.001146 | down |
| <b>HTR5B</b> | 0.178117 | no | 0.490357 | no   |
| <b>HTR6</b>  | 0.424353 | no | 0.007722 | down |
| <b>OPRD1</b> | 0.417739 | no | 0.019075 | down |
| <b>OPRK1</b> | 0.199407 | no | 0.000101 | down |
| <b>OPRM1</b> | 0.372988 | no | 0.031992 | down |
| <b>DRD1</b>  | 0.57586  | no | 0.022982 | down |
| <b>DRD2</b>  | 0.346635 | no | 0.002128 | down |
| <b>DRD5</b>  | 0.061185 | no | 0.000665 | down |

**Figure 3A-3F and Figure 33M-3R**

Up or down in high fat diet mice compared with low fat diet mice

| Area                       | ME      |        | ARC     |        | VMH     |        | DMH     |        |
|----------------------------|---------|--------|---------|--------|---------|--------|---------|--------|
|                            | P       | change | P       | change | P       | change | P       | change |
| <b>Figure 3A</b>           | 0.8513  | no     | 0.0078  | down   | 0.1139  | no     | 0.1509  | no     |
| <b>Figure 3B</b>           | 0.582   | no     | 0.2999  | no     | 0.5259  | no     | 0.4814  | no     |
| <b>Figure 3C</b>           | 0.0358  | down   | <0.0001 | down   | 0.0013  | down   | 0.0358  | down   |
| <b>Figure 3D-NeuN</b>      | 0.0161  | down   | <0.0001 | down   | 0.0012  | down   | 0.0021  | down   |
| <b>Figure 3D-NeuN+BrdU</b> | 0.0021  | down   | 0.3041  | no     | 0.8991  | no     | 0.0012  | down   |
| <b>Figure 3E-NeuN</b>      | 0.2705  | no     | 0.0563  | no     | 0.0085  | down   | 0.0104  | down   |
| <b>Figure 3E-NeuN+BrdU</b> | 0.0003  | down   | 0.0068  | down   | 0.0002  | down   | 0.004   | down   |
| <b>Figure 3F-NeuN</b>      | 0.006   | down   | 0.0128  | down   | 0.002   | down   | 0.0014  | down   |
| <b>Figure 3F-NeuN+BrdU</b> | 0.0012  | down   | 0.0075  | down   | 0.0006  | down   | <0.0001 | down   |
| <b>Figure 3M</b>           | 0.0109  | down   | 0.046   | down   | 0.8716  | no     | 0.6339  | no     |
| <b>Figure 3N</b>           | 0.0255  | dwon   | 0.0023  | down   | 0.0554  | no     | 0.0028  | down   |
| <b>Figure 3O</b>           | 0.6968  | no     | 0.3307  | no.    | 0.0013  | down   | 0.0439  | down   |
| <b>Figure 3P-NeuN</b>      | 0.0504  | no     | 0.0028  | down   | 0.0007  | down   | 0.0002  | down   |
| <b>Figure 3P-NeuN+BrdU</b> | 0.2187  | no     | 0.1996  | no     | 0.0453  | down   | 0.0361  | down   |
| <b>Figure 3Q-NeuN</b>      | 0.8004  | no     | 0.0001  | down   | <0.0001 | down   | 0.4872  | no     |
| <b>Figure 3Q-NeuN+BrdU</b> | 0.0005  | down   | 0.0036  | down   | 0.0007  | down   | 0.0002  | down   |
| <b>Figure 3R-NeuN</b>      | 0.7064  | no     | 0.0598  | no     | 0.1339  | no     | 0.0165  | down   |
| <b>Figure 3R-NeuN+BrdU</b> | <0.0001 | down   | 0.0776  | no     | 0.0519  | no     | 0.0055  | down   |

**Figure 3G-3L and Figure 3S-3Y**

Up or down in high fat diet mice compared with low fat diet mice

| Area             | NPY or POMC cells |        | NPY+BrdU or POMC+BrdU |        |
|------------------|-------------------|--------|-----------------------|--------|
|                  | P                 | change | P                     | change |
| <b>Figure 3G</b> | 0.04              | up     | 0.2338                | no     |
| <b>Figure 3H</b> | 0.3802            | no     | 0.0106                | up     |
| <b>Figure 3I</b> | 0.0479            | up     | 0.1674                | no     |

|                  |        |      |         |      |
|------------------|--------|------|---------|------|
| <b>Figure 3J</b> | 0.0168 | down | 0.0078  | down |
| <b>Figure 3K</b> | 0.0002 | down | <0.0001 | down |
| <b>Figure 3L</b> | 0.0027 | down | 0.0174  | down |
| <b>Figure 3S</b> | 0.0208 | up   | 0.0164  | up   |
| <b>Figure 3T</b> | 0.0123 | up   | 0.0214  | up   |
| <b>Figure 3U</b> | 0.3251 | no   | 0.1825  | no   |
| <b>Figure 3V</b> | 0.2747 | no   | 0.142   | no   |
| <b>Figure 3W</b> | 0.0004 | down | <0.0001 | down |
| <b>Figure 3X</b> | 0.0006 | down | 0.0086  | down |

| Area                    | D9     |        | D15    |        | D21    |        |
|-------------------------|--------|--------|--------|--------|--------|--------|
|                         | P      | change | P      | change | P      | change |
| <b>Figure 3Y male</b>   | 0.0273 | up     | 0.0003 | up     | 0.0361 | up     |
| <b>Figure 3Y female</b> | 0.0285 | up     | 0.0115 | up     | 0.1232 | no     |

#### Figure 4A-4F

Up or down in high fat diet mice compared with low fat diet mice

| Area             | ME     |        | ARC    |        | VMH    |        | DMH    |        |
|------------------|--------|--------|--------|--------|--------|--------|--------|--------|
|                  | P      | change | P      | change | P      | change | P      | change |
| <b>Figure 4A</b> | 0.6985 | no     | 0.8904 | no     | 0.3442 | no     | 0.6279 | no     |
| <b>Figure 4B</b> | 0.0022 | down   | 0.0107 | down   | 0.0387 | down   | 0.0456 | down   |
| <b>Figure 4C</b> | 0.0024 | down   | 0.0028 | down   | 0.0008 | down   | 0.0021 | down   |
| <b>Figure 4D</b> | 0.8299 | no     | 0.876  | no     | 0.438  | no     | 0.974  | no     |
| <b>Figure 4E</b> | 0.0203 | down   | 0.0372 | down   | 0.0127 | down   | 0.252  | no     |
| <b>Figure 4F</b> | 0.1132 | no     | 0.1848 | no     | 0.1042 | no     | 0.3881 | no     |

#### Figure 4G

| Name           | Male       |        | Female  |        |
|----------------|------------|--------|---------|--------|
|                | P Value    | Change | P Value | Change |
| <b>Mki67</b>   | 0.00355512 | down   | 0.0017  | down   |
| <b>Neurod1</b> | 0.00803575 | down   | 0.7227  | no     |
| <b>Neurod2</b> | 0.0027723  | down   | 0.7939  | no     |
| <b>Neurod6</b> | 0.03225876 | down   | 0.6844  | no     |

Figure 5A-5O and Figure 5S-5AH



| Area              | BrdU cells |        | NeuN+BrdU              |        |
|-------------------|------------|--------|------------------------|--------|
|                   | P          | change | P                      | change |
| <b>Figure 5A</b>  | 0.0226     | down   | 0.0233                 | down   |
| <b>Figure 5B</b>  | 0.0411     | down   | 0.0387                 | down   |
| <b>Figure 5C</b>  | 0.2475     | no     | 0.2251                 | no     |
| <b>Figure 5S</b>  | 0.0031     | down   | 0.0047                 | down   |
| <b>Figure 5T</b>  | 0.04       | down   | 0.0382                 | down   |
| <b>Figure 5U</b>  | 0.7399     | no     | 0.7042                 | no     |
|                   | BrdU cells |        | NPY+BrdU or POMC+BrdU  |        |
| <b>Figure 5D</b>  | 0.0353     | down   | 0.3089                 | no     |
| <b>Figure 5E</b>  | 0.0449     | down   | 0.3329                 | no     |
| <b>Figure 5F</b>  | 0.8015     | no     | 0.0123                 | up     |
| <b>Figure 5V</b>  | 0.0111     | down   | 0.8831                 | no     |
| <b>Figure 5W</b>  | 0.0012     | down   | 0.1915                 | no     |
| <b>Figure 5X</b>  | 0.1092     | no     | 0.0311                 | up     |
| <b>Figure 5G</b>  | 0.0096     | down   | 0.0011                 | down   |
| <b>Figure 5H</b>  | 0.005      | down   | 0.0057                 | down   |
| <b>Figure 5I</b>  | 0.1406     | no     | 0.0091                 | down   |
| <b>Figure 5Y</b>  | <0.0001    | down   | 0.0718                 | no     |
| <b>Figure 5Z</b>  | 0.0006     | down   | 0.0688                 | no     |
| <b>Figure 5AB</b> | 0.0712     | no     | 0.0157                 | down   |
|                   | BrdU cells |        | GFAP+BrdU or Iba1+BrdU |        |
| <b>Figure 5J</b>  | 0.0482     | down   | 0.0944                 | no     |
| <b>Figure 5K</b>  | 0.0299     | down   | 0.721                  | no     |
| <b>Figure 5L</b>  | 0.1168     | no     | 0.5185                 | no     |
| <b>Figure 5AC</b> | 0.0059     | down   | 0.6779                 | no     |
| <b>Figure 5AD</b> | 0.0294     | down   | 0.3118                 | no     |
| <b>Figure 5AE</b> | 0.0033     | down   | 0.5324                 | no     |
| <b>Figure 5M</b>  | 0.0055     | down   | 0.089                  | no     |
| <b>Figure 5N</b>  | 0.0237     | down   | >0.9999                | no     |
| <b>Figure 5O</b>  | 0.0551     | down   | 0.49                   | no     |
| <b>Figure 5AF</b> | 0.0076     | down   | 0.1583                 | no     |
| <b>Figure 5AG</b> | 0.0053     | down   | 0.647                  | no     |
| <b>Figure 5AH</b> | 0.155      | no     | 0.3739                 | no     |

**Figure 5P-5R and  
Figure 5AI-5AK**

| Area              | NeuN+BrdU/BrdU cells |        | NPY+BrdU/BrdU cells |        | POMC+BrdU/BrdU cells |        | GFAP+BrdU/BrdU cells |        | Iba1+BrdU/BrdU cells |        |
|-------------------|----------------------|--------|---------------------|--------|----------------------|--------|----------------------|--------|----------------------|--------|
|                   | P                    | change | P                   | change | P                    | change | P                    | change | P                    | change |
| <b>Figure 5P</b>  | 0.223                | no     | 0.1006              | no     | 0.0796               | no     | 0.0041               | up     | 0.684                | no     |
| <b>Figure 5Q</b>  | 0.114                | no     | 0.0014              | up     | 0.1784               | no     | 0.1991               | no     | 0.465                | no     |
| <b>Figure 5R</b>  | 0.5577               | no     | 0.0003              | up     | 0.0049               | down   | 0.271                | no     | 0.4387               | no     |
| <b>Figure 5AI</b> | 0.502                | no     | 0.0096              | up     | 0.9204               | no     | 0.0045               | up     | 0.186                | no     |
| <b>Figure 5AJ</b> | 0.2949               | no     | 0.5796              | no     | 0.4771               | no     | 0.1297               | no     | 0.417                | no     |
| <b>Figure 5AK</b> | 0.7414               | no     | 0.004               | up     | 0.038                | down   | 0.06223              | no     | 0.3739               | no     |

**Figure AL**

| Area                     | D9     |        | D15   |        | D21    |        |
|--------------------------|--------|--------|-------|--------|--------|--------|
|                          | P      | change | P     | change | P      | change |
| <b>Figure 5AL male</b>   | 0.0002 | up     | 0.04  | up     | 0.04   | up     |
| <b>Figure 5AL female</b> | 0.3533 | up     | 0.415 | up     | 0.0022 | up     |

Up or down in high fat diet mice  
compared with low fat diet mice

**Figure 6A**

|                       | Pearson Correlation |        |        |
|-----------------------|---------------------|--------|--------|
|                       | P                   | r      | change |
| <b>CON serum-skim</b> | <0.0001             | 0.71   | yes    |
| <b>CON serum-fat</b>  | <0.0001             | 0.7152 | yes    |
| <b>HFD serum-skim</b> | <0.0001             | 0.7082 | yes    |
| <b>HFD serum-fat</b>  | <0.0001             | 0.7049 | yes    |

**Figure 6B**

|                  | Protein |        | Carbohydrate |        | Fatty acid |        |
|------------------|---------|--------|--------------|--------|------------|--------|
|                  | P       | change | P            | change | P          | change |
| <b>Figure 6B</b> | 0.5468  | no     | 0.4685       | no     | 0.0001     | up     |

Up or down in HFD mice compared with low fat diet mice

Figure 6C, 6D and 6E

| Name             | Diet    |        | Milk    |        | Brain-M |        | Brain-F |        |
|------------------|---------|--------|---------|--------|---------|--------|---------|--------|
|                  | P Value | Change | P Value | Change | P Value | Change | P Value | Change |
| <b>CE</b>        | 0.0336  | up     | <0.0001 | up     | 0.1197  | no     | 0.0875  | no     |
| <b>CHO</b>       | 0.0005  | up     | 0.0381  | up     | 0.0554  | no     | 0.6895  | no     |
| <b>TAG</b>       | 0.0025  | up     | 0.0065  | down   | 0.4985  | no     | 0.3258  | no     |
| <b>DAG</b>       | 0.7121  | no     | 0.0722  | no     | 0.6856  | no     | 0.0397  | up     |
| <b>SM</b>        | 0.9925  | no     | 0.0014  | up     | 0.3517  | no     | 0.5564  | no     |
| <b>Cer</b>       | 0.743   | no     | 0.0287  | up     | 0.0049  | down   | 0.9654  | no     |
| <b>GluCer</b>    | 0.908   | no     | 0.0774  | no     | 0.0043  | down   | 0.8268  | no     |
| <b>GM3</b>       | 0.958   | no     | 0.3048  | no     | 0.0091  | down   | 0.2884  | no     |
| <b>LBPA</b>      | 0.2711  | no     | 0.0012  | up     | 0.2437  | no     | 0.2933  | no     |
| <b>LPC</b>       | 0.0037  | down   | 0.0305  | up     | 0.2055  | no     | 0.5476  | no     |
| <b>PC</b>        | 0.7825  | no     | 0.0005  | up     | 0.2171  | no     | 0.6427  | no     |
| <b>PE</b>        | 0.4449  | no     | 0.0058  | up     | 0.2289  | no     | 0.582   | no     |
| <b>PA</b>        | 0.0754  | no     | 0.0631  | up     | 0.3354  | no     | 0.543   | no     |
| <b>PG</b>        | 0.7064  | no     | 0.0026  | up     | 0.036   | up     | 0.0042  | down   |
| <b>PI</b>        | 0.641   | no     | 0.004   | up     | 0.0237  | down   | 0.5326  | no     |
| <b>PS</b>        | 0.9948  | no     | 0.0157  | up     | 0.0381  | down   | 0.5899  | no     |
| <b>SL</b>        |         |        |         |        | 0.4666  | no     | 0.6037  | no     |
| <b>Sph d18:1</b> |         |        |         |        | 0.8637  | no     | 0.6756  | no     |

**Figure 6G**

| Name              | Brain-M |        | Brain-F |        |
|-------------------|---------|--------|---------|--------|
|                   | P Value | Change | P Value | Change |
| Cer d18:0/18:0    | 0.6115  | no     | 0.67    | no     |
| Cer d18:0/20:0    | 0.1665  | no     | 0.1072  | no     |
| Cer d18:0/22:0    | 0.0716  | no     | 0.2895  | no     |
| Cer d18:1/16:0    | 0.4685  | no     | 0.939   | no     |
| Cer d18:1/18:0    | 0.3941  | no     | 0.5115  | no     |
| Cer d18:1/20:0    | 0.1749  | no     | 0.9521  | no     |
| Cer d18:1/22:0    | 0.0345  | down   | 0.9187  | no     |
| Cer d18:1/24:0    | 0.0357  | down   | 0.2122  | no     |
| Cer d18:1/24:1    | 0.1249  | no     | 0.6506  | no     |
| GalCer d18:0/18:0 | 0.0108  | down   | 0.145   | no     |
| GalCer d18:0/22:0 | 0.0005  | down   | 0.7557  | no     |
| GalCer d18:0/24:0 | 0.0029  | down   | 0.6658  | no     |
| GalCer d18:0/24:1 | 0.0038  | down   | 0.7689  | no     |
| GalCer d18:1/16:0 | 0.004   | down   | 0.3752  | no     |
| GalCer d18:1/18:0 | 0.001   | down   | 0.5814  | no     |
| GalCer d18:1/20:0 | 0.0039  | down   | 0.818   | no     |
| GalCer d18:1/22:0 | 0.001   | down   | 0.9534  | no     |
| GalCer d18:1/24:0 | 0.0211  | down   | 0.9057  | no     |
| GalCer d18:1/24:1 | 0.0401  | down   | 0.902   | no     |
| GluCer d18:0/18:0 | 0.0948  | no     | 0.3799  | no     |
| GluCer d18:0/22:0 | 0.0011  | down   | 0.8011  | no     |
| GluCer d18:0/24:0 | 0.009   | down   | 0.4446  | no     |
| GluCer d18:0/24:1 | 0.0049  | down   | 0.6158  | no     |
| GluCer d18:1/16:0 | 0.0101  | down   | 0.17    | no     |
| GluCer d18:1/18:0 | 0.0051  | down   | 0.1734  | no     |
| GluCer d18:1/20:0 | 0.0064  | down   | 0.0964  | no     |
| GluCer d18:1/22:0 | <0.0001 | down   | 0.0992  | no     |
| GluCer d18:1/24:0 | 0.0263  | down   | 0.734   | no     |
| GluCer d18:1/24:1 | 0.0378  | down   | 0.9615  | no     |

**Figure 6H-milk**

| Name    | Milk    |        |
|---------|---------|--------|
|         | P Value | Change |
| PG32:1  | 0.0372  | down   |
| PG32:2  | 0.3709  | no     |
| PG34:1  | 0.6236  | no     |
| PG34:2  | 0.0682  | no     |
| PG34:3  | 0.3413  | no     |
| PG36:1  | 0.0004  | up     |
| PG36:2  | 0.0002  | up     |
| PG36:3  | 0.005   | up     |
| PG36:4  | 0.0021  | up     |
| PI 34:1 | 0.8     | no     |

|         |        |      |
|---------|--------|------|
| PI 34:2 | 0.928  | no   |
| PI 36:1 | 0.0023 | up   |
| PI 36:2 | 0.0017 | up   |
| PI 36:3 | 0.0387 | up   |
| PI 36:4 | 0.5055 | no   |
| PI 38:3 | 0.0199 | up   |
| PI 38:4 | 0.0008 | up   |
| PI 38:5 | 0.0236 | up   |
| PI 40:4 | 0.2632 | no   |
| PI 40:5 | 0.6327 | no   |
| PI 40:6 | 0.3303 | no   |
| PS 34:1 | 0.0004 | down |
| PS 34:2 | 0.1705 | no   |
| PS 36:1 | 0.0142 | up   |
| PS 36:2 | 0.0094 | up   |
| PS 38:3 | 0.091  | no   |
| PS 38:4 | 0.0036 | up   |
| PS 38:5 | 0.5419 | no   |
| PS 40:4 | 0.511  | no   |
| PS 40:5 | 0.0006 | up   |
| PS 40:6 | 0.0001 | up   |
| PS 40:7 | 0.0453 | up   |

Figure 6H-brain

| Name           | Brain-M |        | Brain-F |        |
|----------------|---------|--------|---------|--------|
|                | P Value | Change | P Value | Change |
| <b>PG32:1</b>  | 0.1306  | no     | 0.012   | down   |
| <b>PG32:2</b>  | 0.0117  | up     | 0.0001  | down   |
| <b>PG34:1</b>  | 0.157   | no     | 0.002   | down   |
| <b>PG34:2</b>  | 0.0236  | up     | 0.003   | down   |
| <b>PG34:3</b>  | 0.0013  | up     | 0.0042  | down   |
| <b>PG36:1</b>  | 0.1486  | no     | 0.0627  | no     |
| <b>PG36:2</b>  | 0.0022  | up     | 0.492   | no     |
| <b>PG36:3</b>  | 0.0044  | up     | 0.0538  | no     |
| <b>PG36:4</b>  | 0.0694  | no     | 0.6052  | no     |
| <b>PG38:3</b>  | 0.0064  | up     | 0.3582  | no     |
| <b>PG38:4</b>  | 0.0949  | no     | 0.2452  | no     |
| <b>PG38:5</b>  | 0.0152  | up     | 0.0483  | down   |
| <b>PG38:6</b>  | 0.0045  | up     | 0.2855  | no     |
| <b>PI 34:1</b> | 0.0616  | no     | 0.9981  | no     |
| <b>PI 34:2</b> | 0.1215  | no     | 0.5723  | no     |
| <b>PI 36:1</b> | 0.0253  | down   | 0.0853  | no     |
| <b>PI 36:2</b> | 0.0443  | down   | 0.909   | no     |
| <b>PI 36:3</b> | 0.0714  | no     | 0.2668  | no     |
| <b>PI 36:4</b> | 0.1448  | no     | 0.7944  | no     |
| <b>PI 38:3</b> | 0.0279  | down   | 0.2546  | no     |

|                |        |      |        |      |
|----------------|--------|------|--------|------|
| <b>PI 38:4</b> | 0.0236 | down | 0.5225 | no   |
| <b>PI 38:5</b> | 0.0047 | down | 0.6763 | no   |
| <b>PI 40:3</b> | 0.1065 | no   | 0.6272 | no   |
| <b>PI 40:4</b> | 0.0165 | down | 0.2265 | no   |
| <b>PI 40:5</b> | 0.0697 | no   | 0.5961 | no   |
| <b>PI 40:6</b> | 0.2337 | no   | 0.26   | no   |
| <b>PS 34:1</b> | 0.9543 | no   | 0.6471 | no   |
| <b>PS 34:2</b> | 0.2469 | no   | 0.0973 | no   |
| <b>PS 36:1</b> | 0.0018 | down | 0.6704 | no   |
| <b>PS 36:2</b> | 0.1134 | no   | 0.0703 | no   |
| <b>PS 38:3</b> | 0.0298 | down | 0.455  | no   |
| <b>PS 38:4</b> | 0.0291 | down | 0.4924 | no   |
| <b>PS 38:5</b> | 0.0089 | down | 0.7683 | no   |
| <b>PS 40:4</b> | 0.9688 | no   | 0.878  | no   |
| <b>PS 40:5</b> | 0.0032 | down | 0.0064 | down |
| <b>PS 40:6</b> | 0.2    | no   | 0.4818 | no   |
| <b>PS 40:7</b> | 0.3823 | no   | 0.4234 | no   |

Supplementary Figure 1

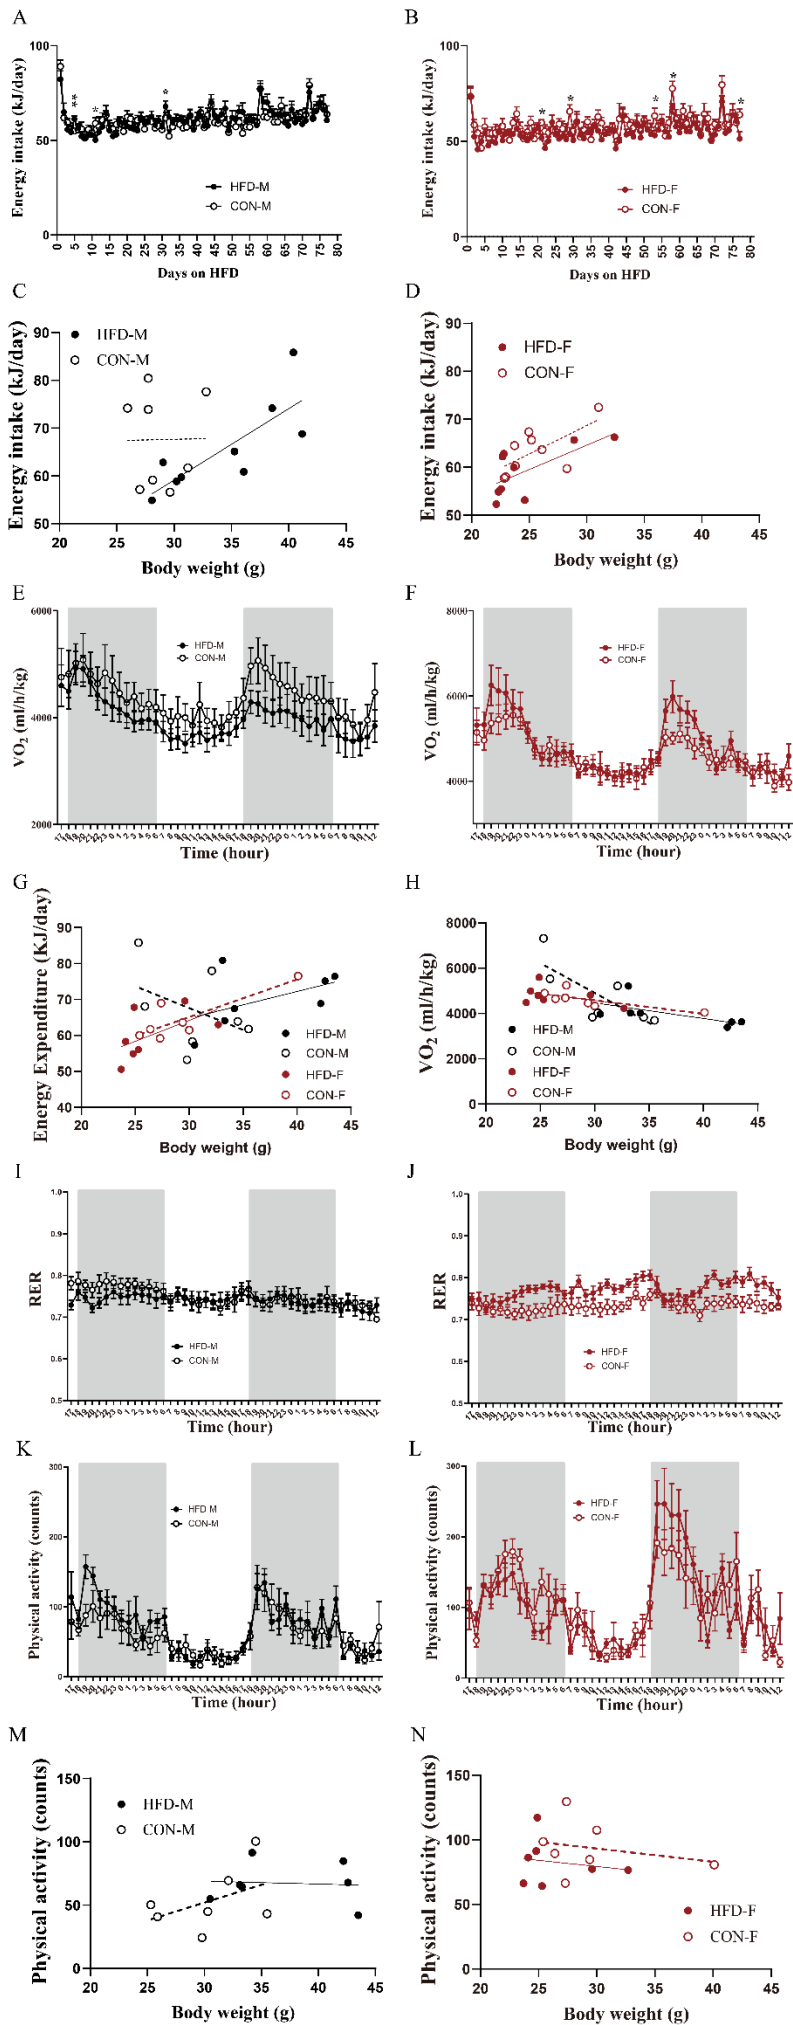

## Supplementary Figure 2

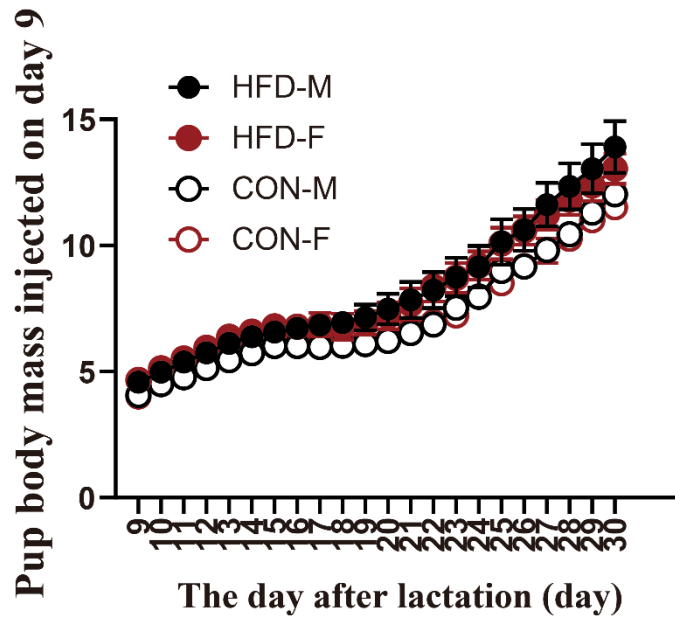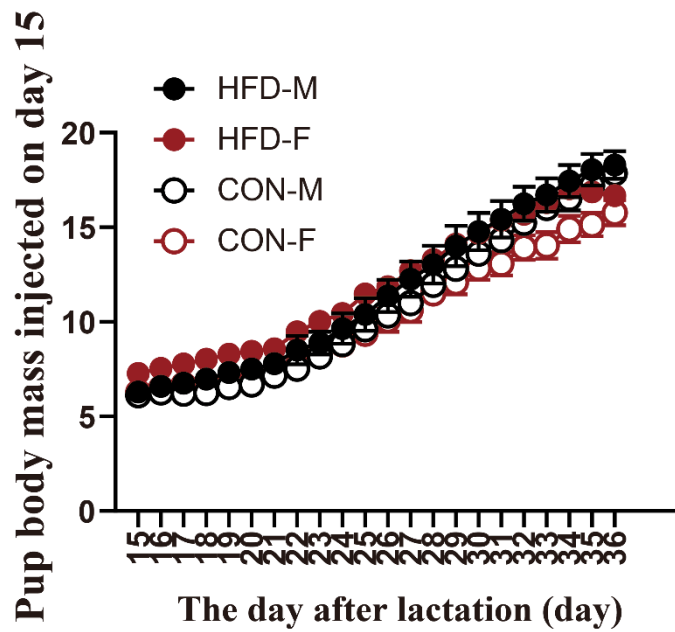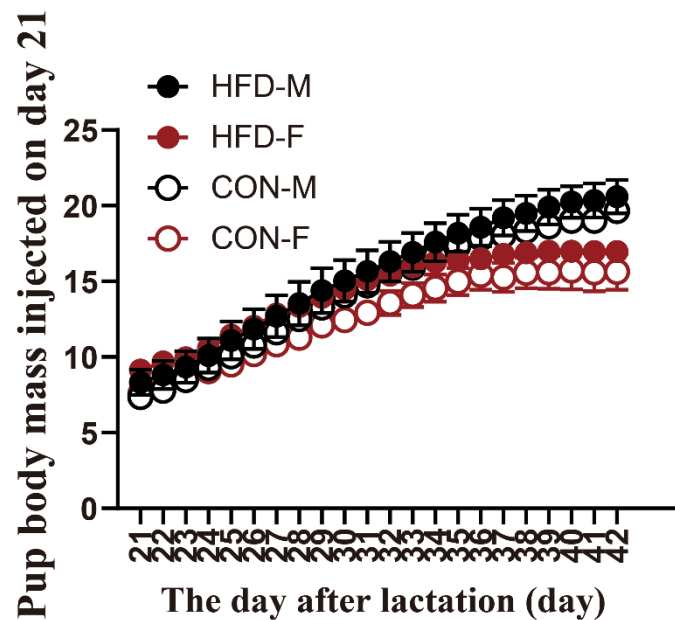



# Supplementary Figure 3

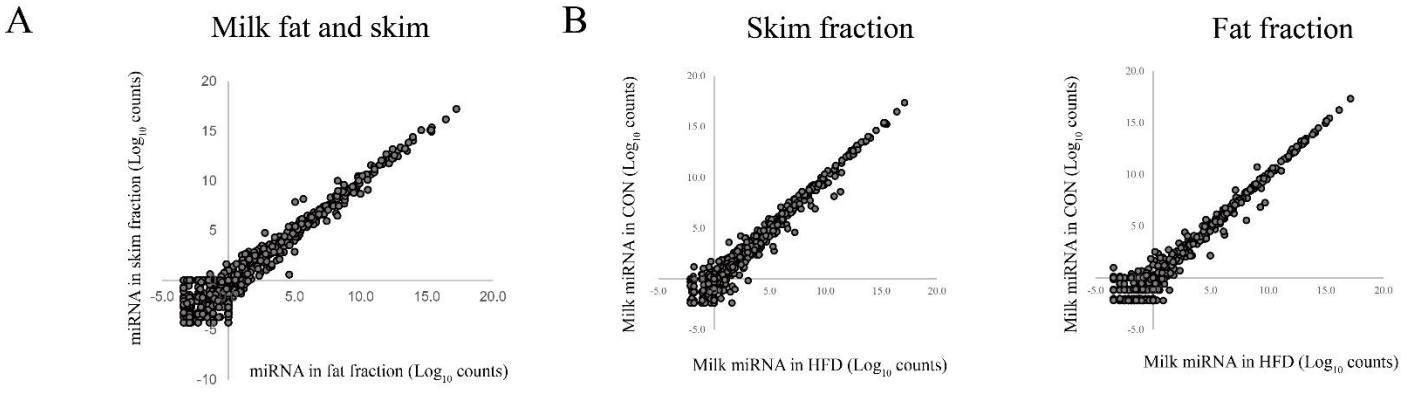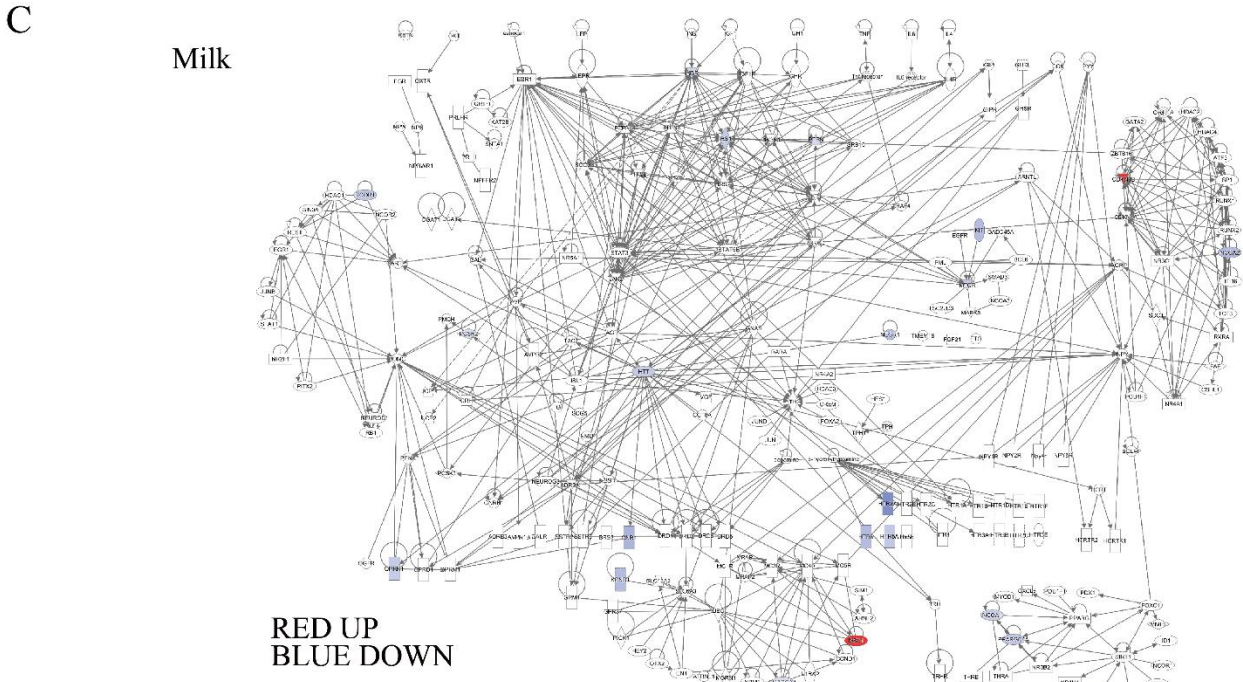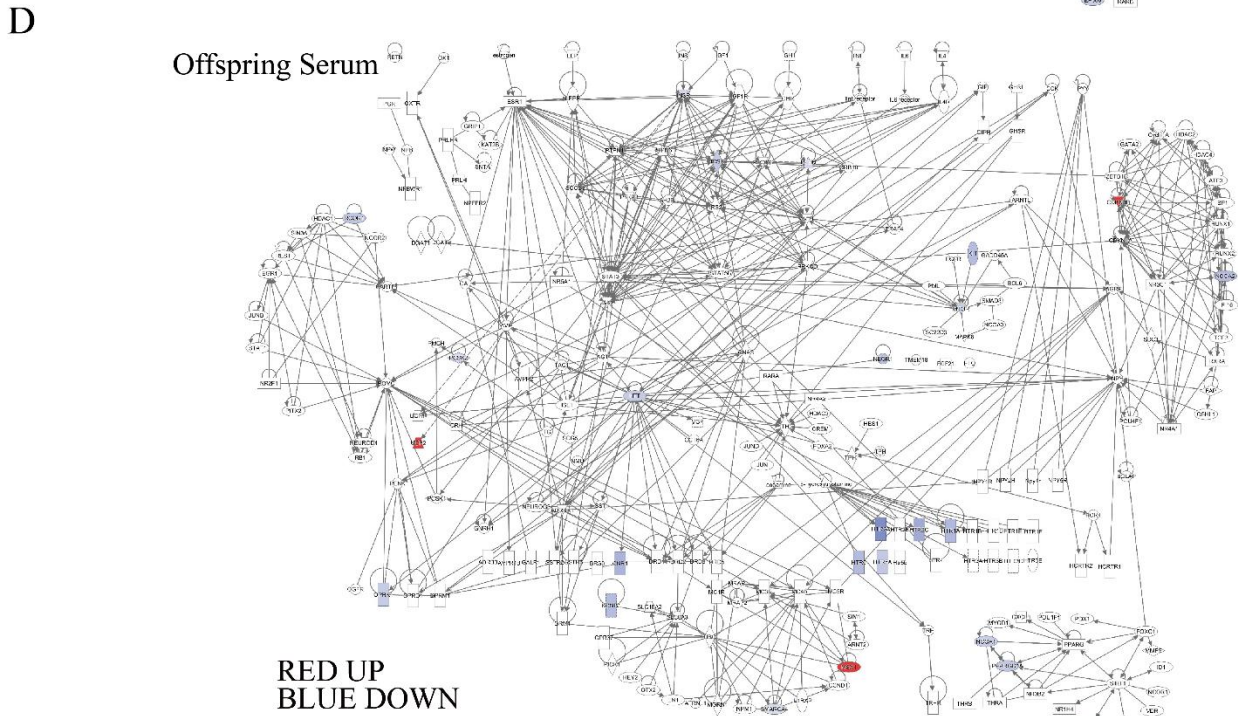

# Supplementary Figure 4

## A LysoPC

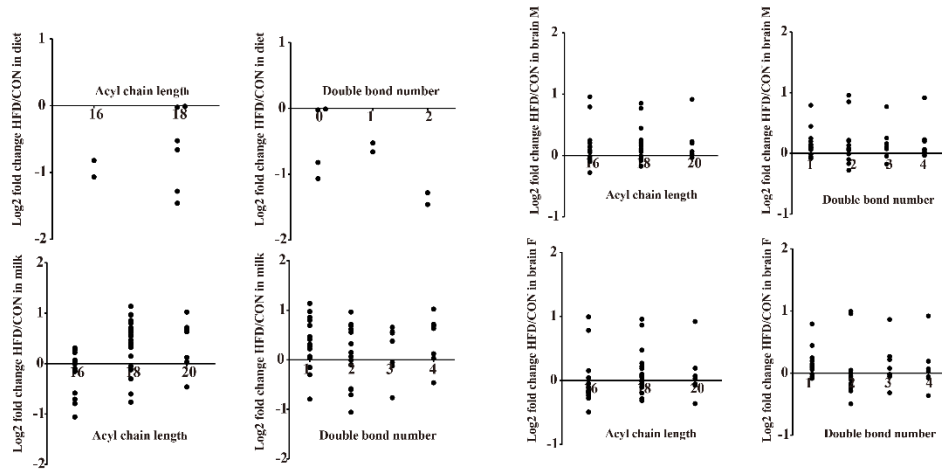

## B Phospholipid

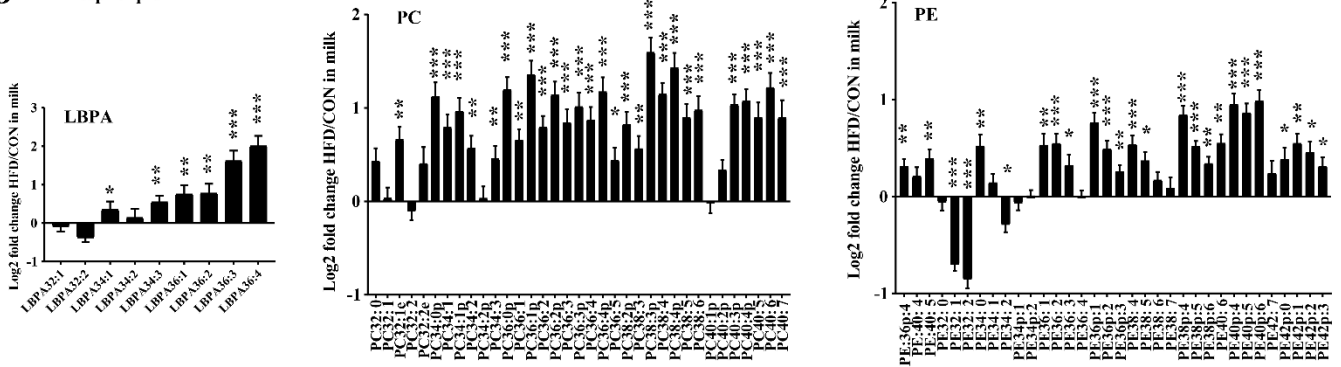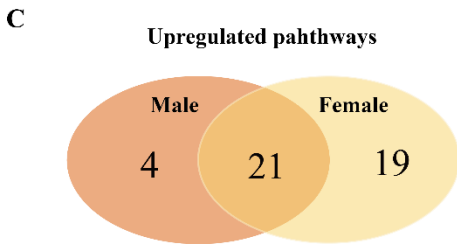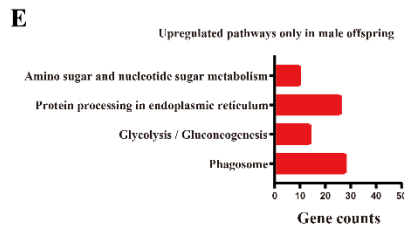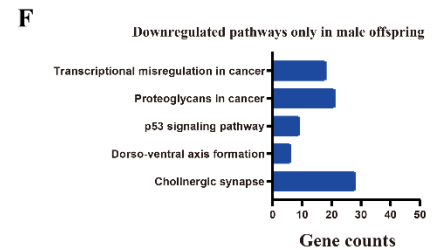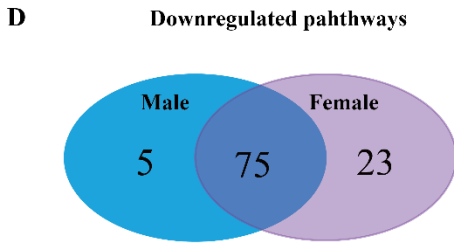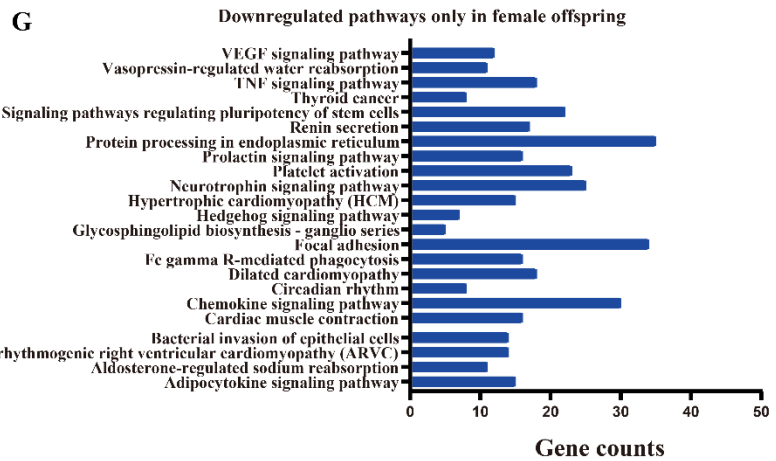

**Figure S1.** The effect of maternal HFD during lactation on energy balance and metabolism of adult male and female offspring mice exposed to an HFD

(A and B) Energy intake of adult male and female offspring mice that had previously been raised by mothers fed a HFD or a CON during lactation, in response to a 11-week HFD exposure in later life (n = 8-9).

(C and D) The correlation between body weight and energy intake in adult male (C) and female (D) offspring (n=8-9).

(E and F) Metabolic chamber measurements of oxygen consumption (VO<sub>2</sub>) in adult male (E) and female (F) offspring after 10 weeks of HFD exposure (n = 7).

(G and H) The correlation between body weight and energy expenditure (G) or VO<sub>2</sub> (H) in adult male and female offspring (n = 7).

(I-L) Metabolic chamber measurements of RER (I and J) and physical activity (K and L) in male and female offspring (n = 7).

(M and N) The correlation between body weight and physical activity in adult male (M) and female (N) offspring (n = 7).

Values are represented as mean ± SEM, and analyzed by two-way ANOVA.

**Figure S2.** The effect of maternal HFD on the change of male and female pup's body mass, which was measured for 21 days after BrdU injection on postnatal day 9, day 15, and day 21 (n = 7). Values are represented as mean ± SEM, and analyzed by two-way ANOVA

**Figure S3.** Target gene networks of miRNAs in milk and pup serum in response to maternal HFD feeding during lactation

(A) The correlation of miRNAs in milk skim fraction and fat fraction (n = 8).

(B) The effect of maternal HFD on miRNAs in skim fraction (left) and fat fraction (right) (n = 8)

(C and D) Pathway diagram of target genes of miRNAs in milk (C) (n = 8) and offspring serum (D) (n = 24). Red indicates the upregulation, blue indicates the downregulation (p < 0.05), while gray indicates no significance. Intensity of the color is related to the absolute values of log<sub>10</sub> (p value).

**Figure S4.** Lipidomics profiling in response to maternal HFD feeding during lactation

(A) LysoPC fold change (HFD versus CON) in diet (n = 2), milk (n = 8), and male and female pup hypothalami (n = 7).

(B) Phospholipids fold change including LBPA, PC, and PE (HFD versus CON) in milk (n = 8).

(C and D) Upregulated (C) and downregulated (D) pathways in male and female pup hypothalami (n = 5).

(E) KEGG pathway analysis showed upregulated pathways that are only enriched in male pup hypothalami (n = 5).

(F) KEGG pathway analysis showed downregulated pathways that are only enriched in male pup hypothalami (n = 5).

(G) KEGG pathway analysis showed downregulated pathways that are only enriched in female pup hypothalami (n = 5).

Values are represented as mean ± SEM and analyzed by unpaired Student's t test. Differences with p < 0.05 were considered significant. \*p < 0.05, \*\*p < 0.01, \*\*\* p < 0.001.
